# Supplementary material
Source: MDPI journal article supplement (https://www.mdpi.com/2227-9717/9/11/2010)
Supplement: s1 [file s1 › processes-1447060-supplementary.pdf]

## Supporting Information

for

### **Miniaturization of Anthracene-Containing Nonapeptides for Selective Precipitation/Recovery of Metallic Gold from Aqueous Solutions Containing Gold and Platinum Ions**

Kin-ya Tomizaki,<sup>\*,a,b</sup> Tatsuki Tonoda,<sup>a</sup> Haruka Okazaki,<sup>a</sup> Shungo Teramura,<sup>a</sup> Takahito Imai,<sup>a</sup> and Masahiro Asano<sup>\*,c</sup>

#### **Contents**

1. Chemical structures of RU065 (*a*) and twenty-three of its fragment peptides (*b–x*) (**Figure S1**)
2. Molecular mass data for RU065 (*a*) and twenty-three of its fragment peptides (*b–x*) (**Table S1**)
3. HPLC and MALDI-TOFMS data for RU065 (*a*) and twenty-three of its fragment peptides (*b–x*) (**Figure S2**)
4. UV-vis absorption spectra for RU065 (*a*) and twenty-three of its fragment peptides (*b–x*) (**Figure S3**)
5. EDS-FESEM data for RU065 (*a*) and twenty-three of its fragment peptides (*b–x*) (**Figure S4**)
6. HPLC data for RU065 (*a*) and twenty-three of its fragment peptides (*b–x*) (**Table S2**)

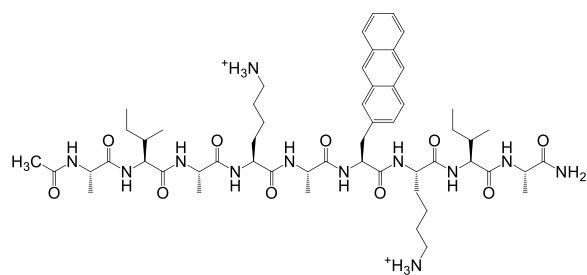

**(a)** RU065

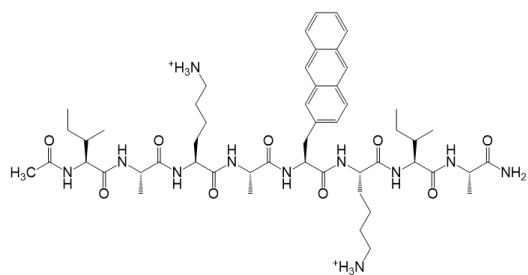

**(b)** RU065<sub>2-9</sub>

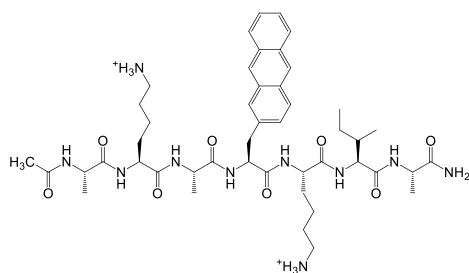

**(c)** RU065<sub>3-9</sub>

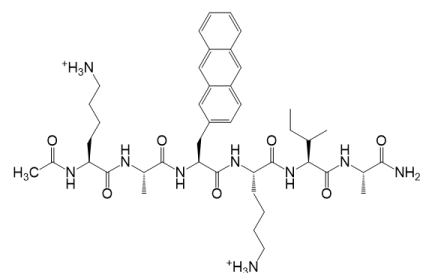

**(d)** RU065<sub>4-9</sub>

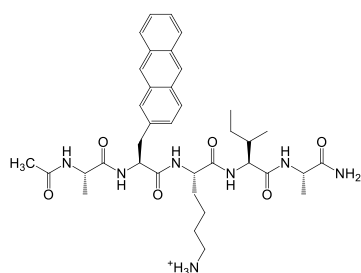

**(e)** RU065<sub>5-9</sub>

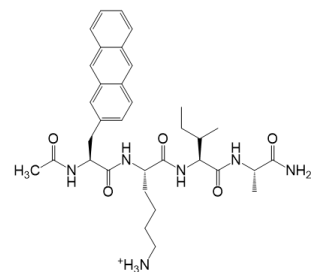

**(f)** RU065<sub>6-9</sub>

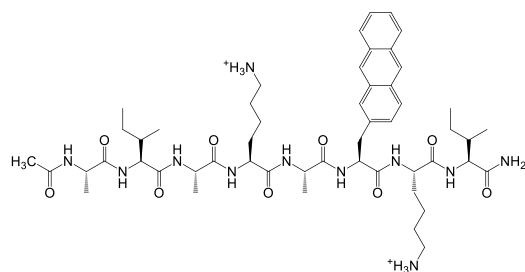

**(g)** RU065<sub>1-8</sub>

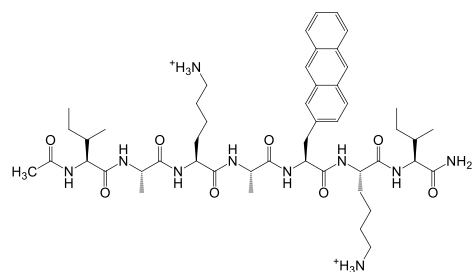

**(h)** RU065<sub>2-8</sub>

**Figure S1.** Chemical structures of RU065 and its fragment peptides.

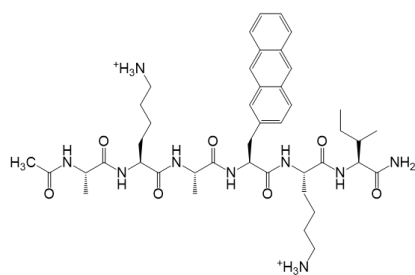

**(i)** RU065<sub>3-8</sub>

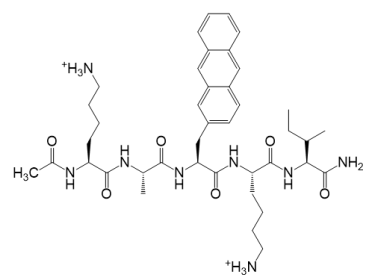

**(j)** RU065<sub>4-8</sub>

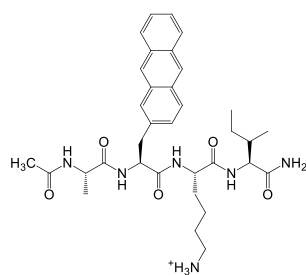

**(k)** RU065<sub>5-8</sub>

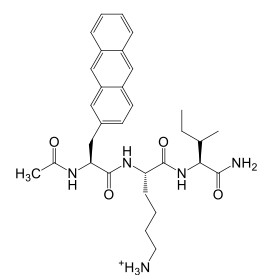

**(l)** RU065<sub>6-8</sub>

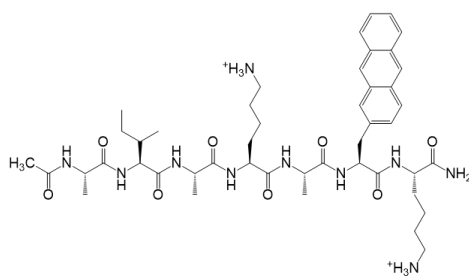

**(m)** RU065<sub>1-7</sub>

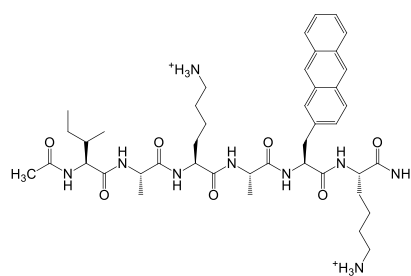

**(n)** RU065<sub>2-7</sub>

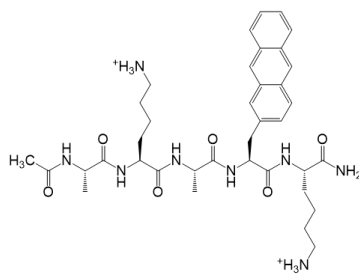

**(o)** RU065<sub>3-7</sub>

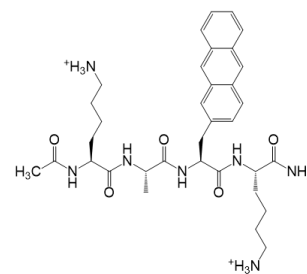

**(p)** RU065<sub>4-7</sub>

**Figure S1 (continued).** Chemical structures of RU065 and its fragment peptides.

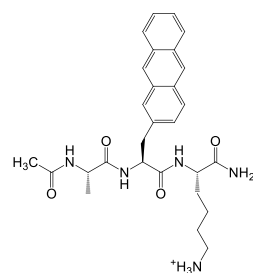

(*q*) RU065<sub>5-7</sub>

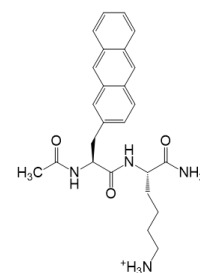

(*r*) RU065<sub>6-7</sub>

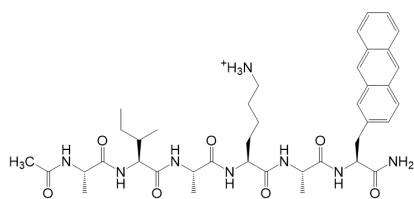

(*s*) RU065<sub>1-6</sub>

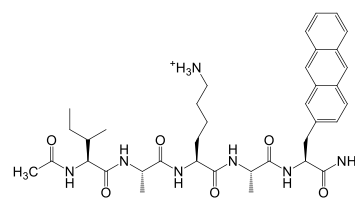

(*t*) RU065<sub>2-6</sub>

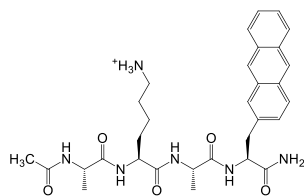

(*u*) RU065<sub>3-6</sub>

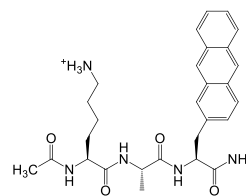

(*v*) RU065<sub>4-6</sub>

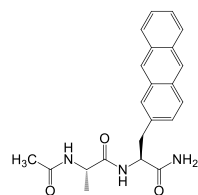

(*w*) RU065<sub>5-6</sub>

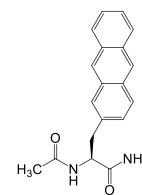

(*x*) RU065<sub>6</sub>

**Figure S1 (continued).** Chemical structures of RU065 and its fragment peptides.

**Table S1.** Summary of the molecular weight data calculated and observed by MALDI-TOFMS ( $[M + H]^+$ ) for RU065 and its fragment peptides.

| Peptide |                      | Molecular weight<br>(calculated) | Molecular weight<br>(observed by<br>MALDI-TOFMS, $[M + H]^+$ ) |
|---------|----------------------|----------------------------------|----------------------------------------------------------------|
| (a)     | RU065                | 1073.3                           | 1074.7                                                         |
| (b)     | RU065 <sub>2-9</sub> | 1004.3                           | 1006.0                                                         |
| (c)     | RU065 <sub>3-9</sub> | 891.1                            | 890.4                                                          |
| (d)     | RU065 <sub>4-9</sub> | 820.0                            | 819.7                                                          |
| (e)     | RU065 <sub>5-9</sub> | 690.6                            | 691.4                                                          |
| (f)     | RU065 <sub>6-9</sub> | 619.8                            | 619.2                                                          |
| (g)     | RU065 <sub>1-8</sub> | 1004.3                           | 1004.7                                                         |
| (h)     | RU065 <sub>2-8</sub> | 933.2                            | 933.4                                                          |
| (i)     | RU065 <sub>3-8</sub> | 820.0                            | 820.1                                                          |
| (j)     | RU065 <sub>4-8</sub> | 749.0                            | 748.9                                                          |
| (k)     | RU065 <sub>5-8</sub> | 619.8                            | 620.3                                                          |
| (l)     | RU065 <sub>6-8</sub> | 548.7                            | 547.5                                                          |
| (m)     | RU065 <sub>1-7</sub> | 891.1                            | 891.1                                                          |
| (n)     | RU065 <sub>2-7</sub> | 820.0                            | 820.8                                                          |
| (o)     | RU065 <sub>3-7</sub> | 706.9                            | 707.8                                                          |
| (p)     | RU065 <sub>4-7</sub> | 635.8                            | 636.5                                                          |
| (q)     | RU065 <sub>5-7</sub> | 506.6                            | 507.9                                                          |
| (r)     | RU065 <sub>6-7</sub> | 435.5                            | 435.4                                                          |
| (s)     | RU065 <sub>1-6</sub> | 761.9                            | 762.5                                                          |
| (t)     | RU065 <sub>2-6</sub> | 690.9                            | 692.8                                                          |
| (u)     | RU065 <sub>3-6</sub> | 577.7                            | 575.3                                                          |
| (v)     | RU065 <sub>4-6</sub> | 506.6                            | 505.2                                                          |
| (w)     | RU065 <sub>5-6</sub> | 377.4                            | 378.0                                                          |
| (x)     | RU065 <sub>6</sub>   | 306.4                            | 305.6                                                          |

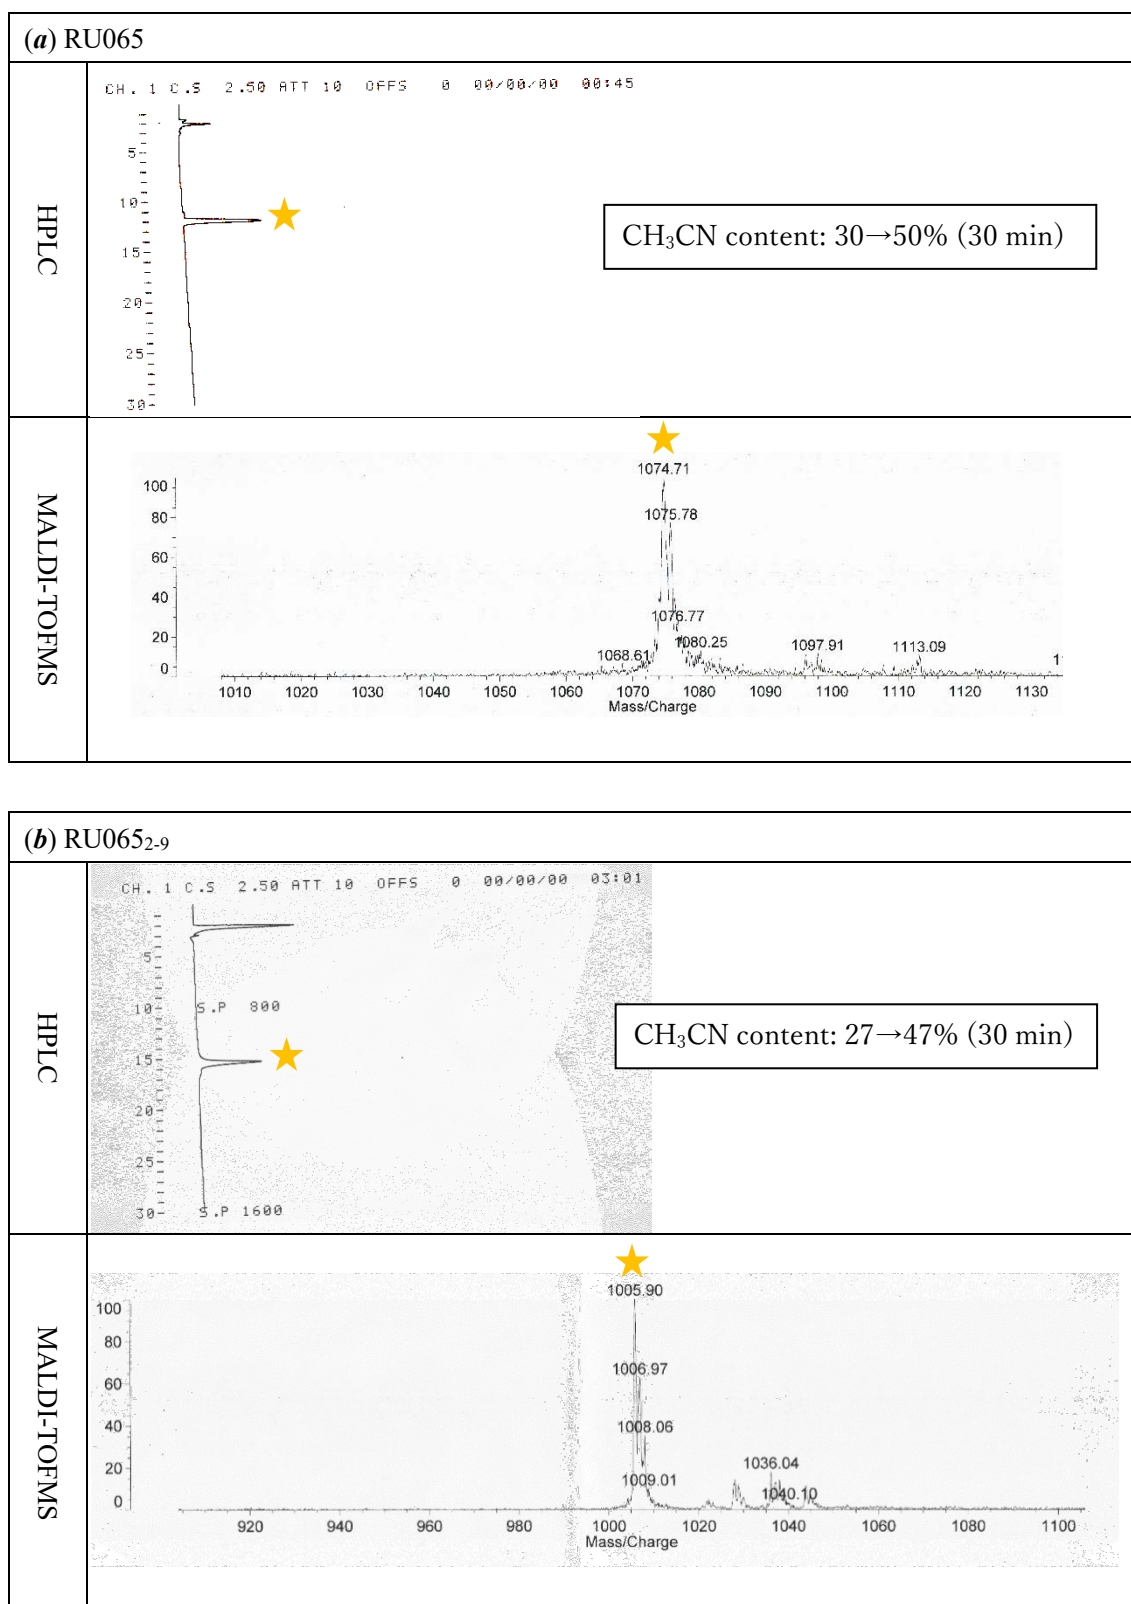

**Figure S2.** HPLC and MALDI-TOFMS data for RU065 and its fragment peptides. Inset: linear gradient of CH<sub>3</sub>CN content for 30 min.

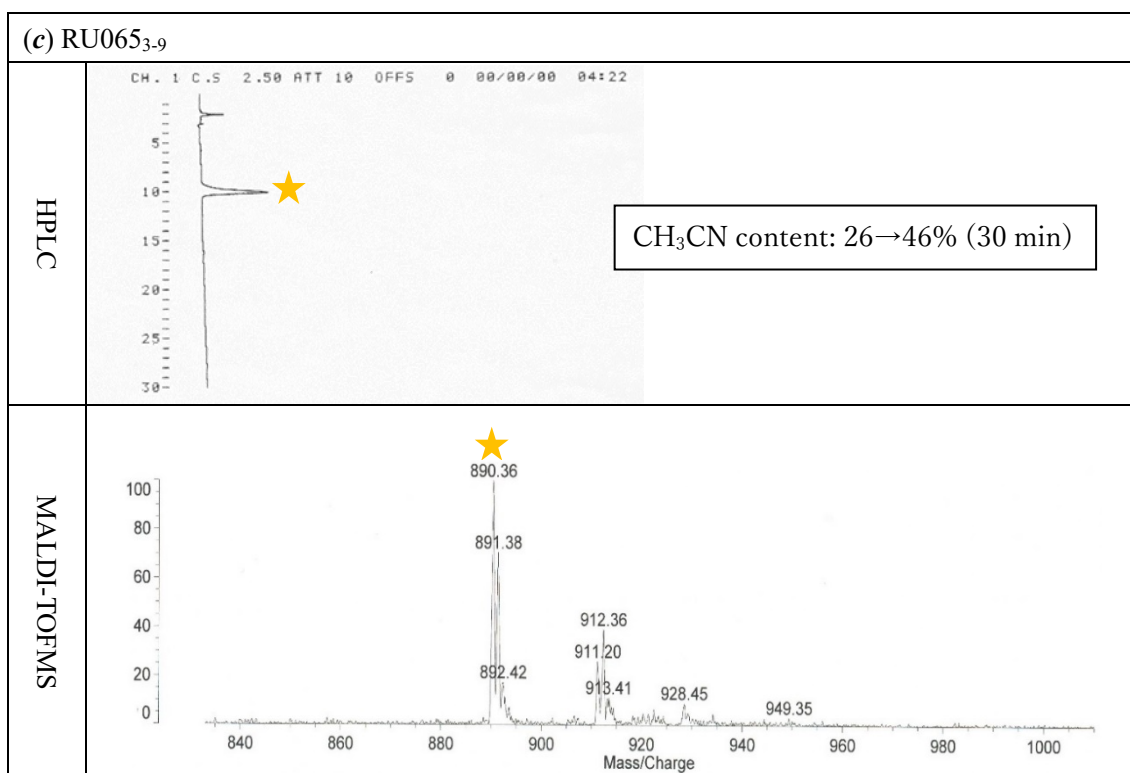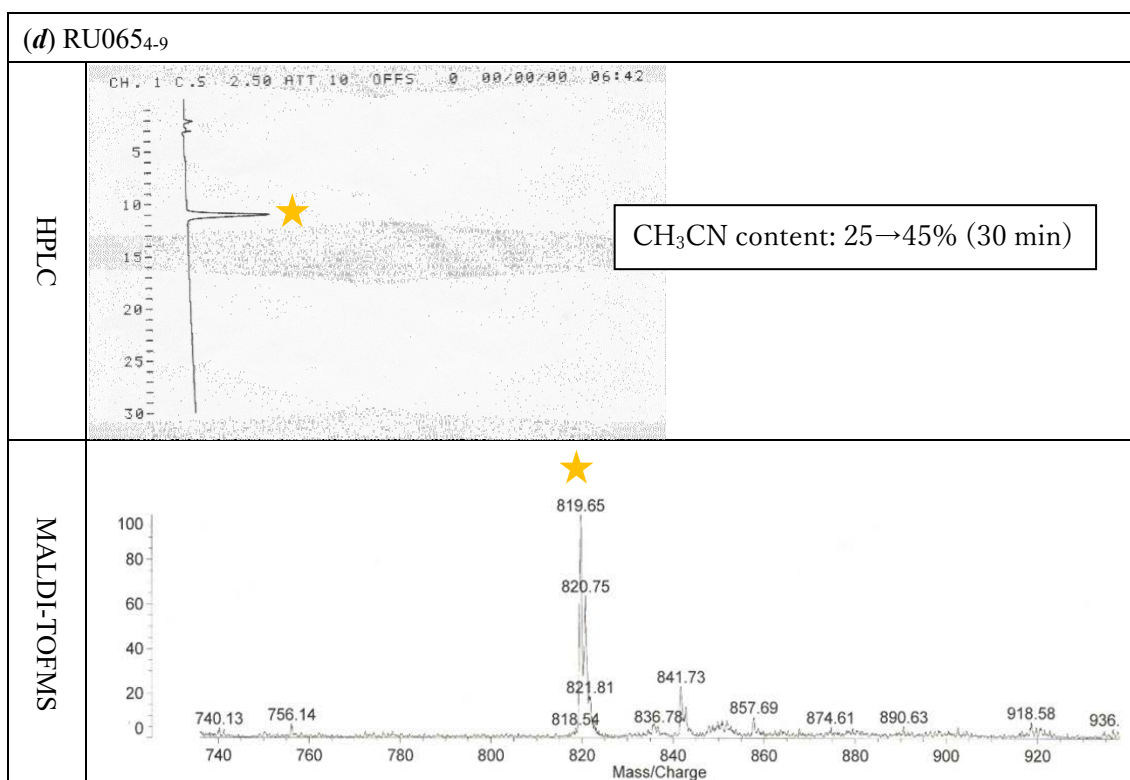

**Figure S2 (continued).** HPLC and MALDI-TOFMS data for RU065 and its fragment peptides. Inset: linear gradient of CH<sub>3</sub>CN content for 30 min.

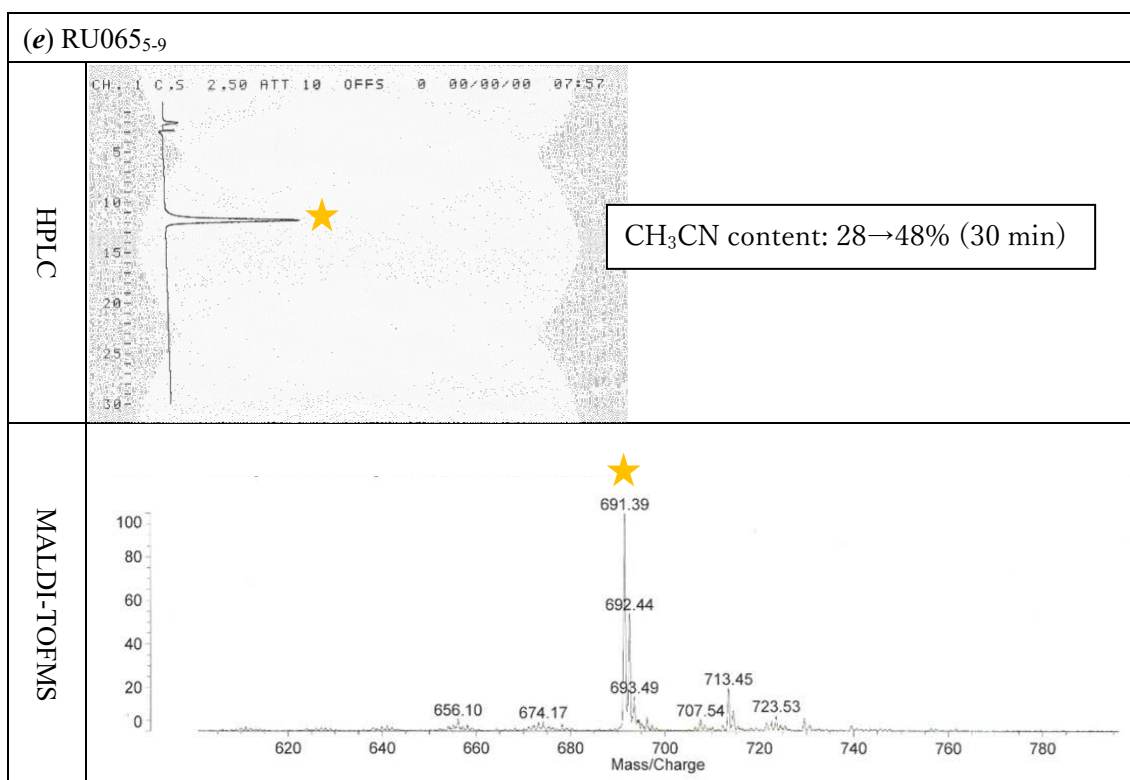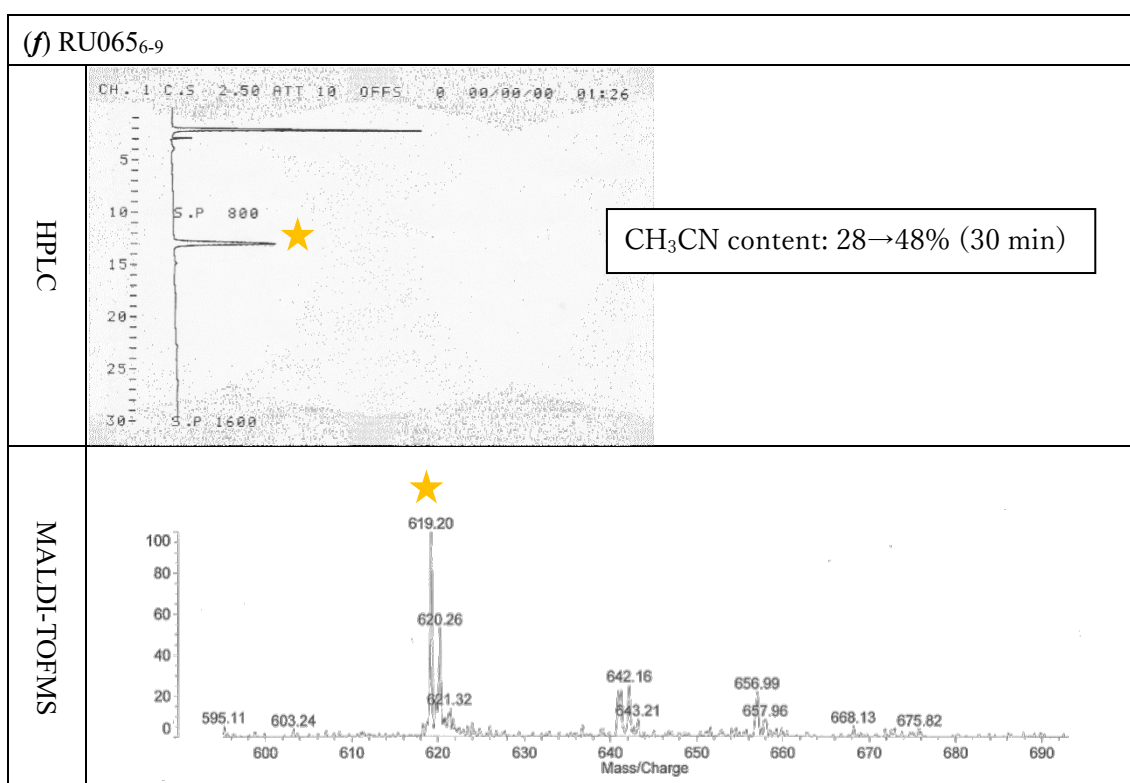

**Figure S2 (continued).** HPLC and MALDI-TOFMS data for RU065 and its fragment peptides. Inset: linear gradient of CH<sub>3</sub>CN content for 30 min.

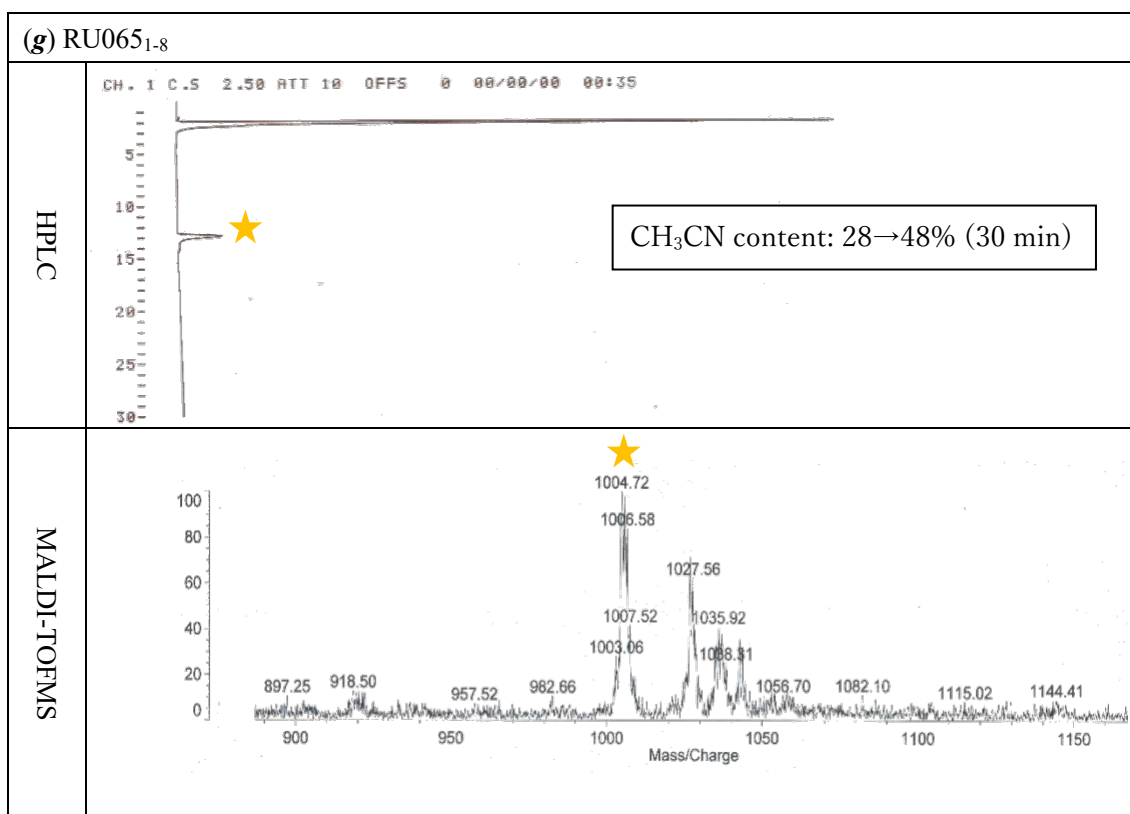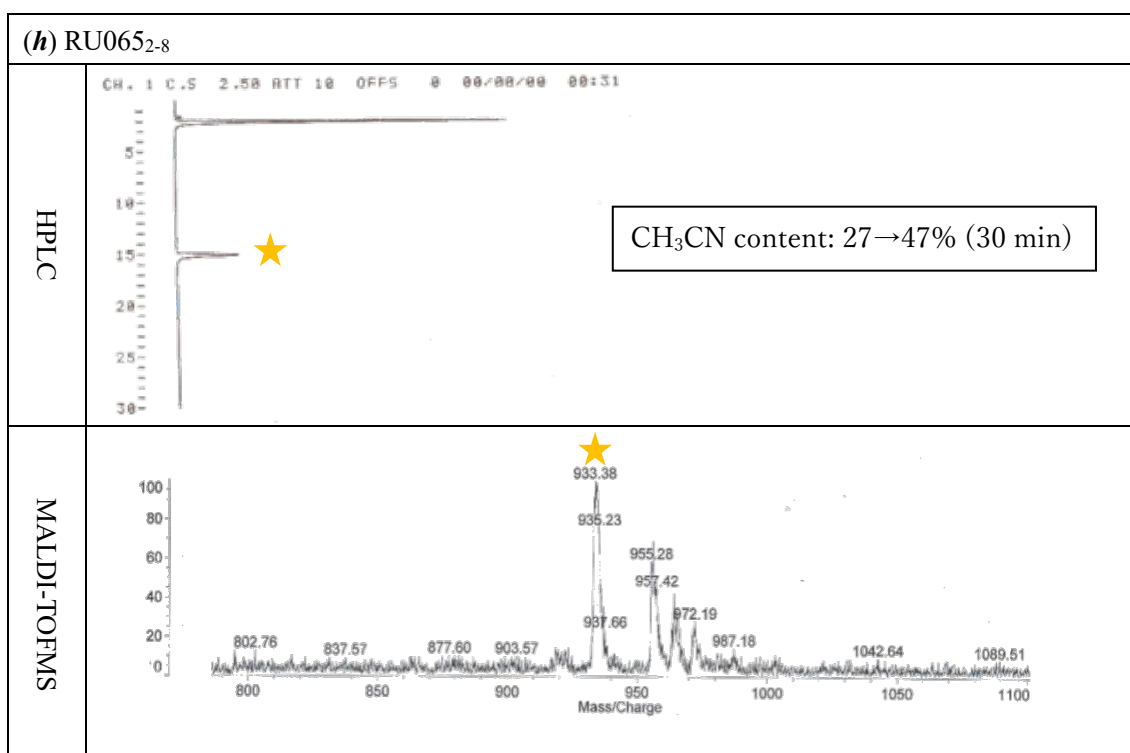

**Figure S2 (continued).** HPLC and MALDI-TOFMS data for RU065 and its fragment peptides. Inset: linear gradient of CH<sub>3</sub>CN content for 30 min.

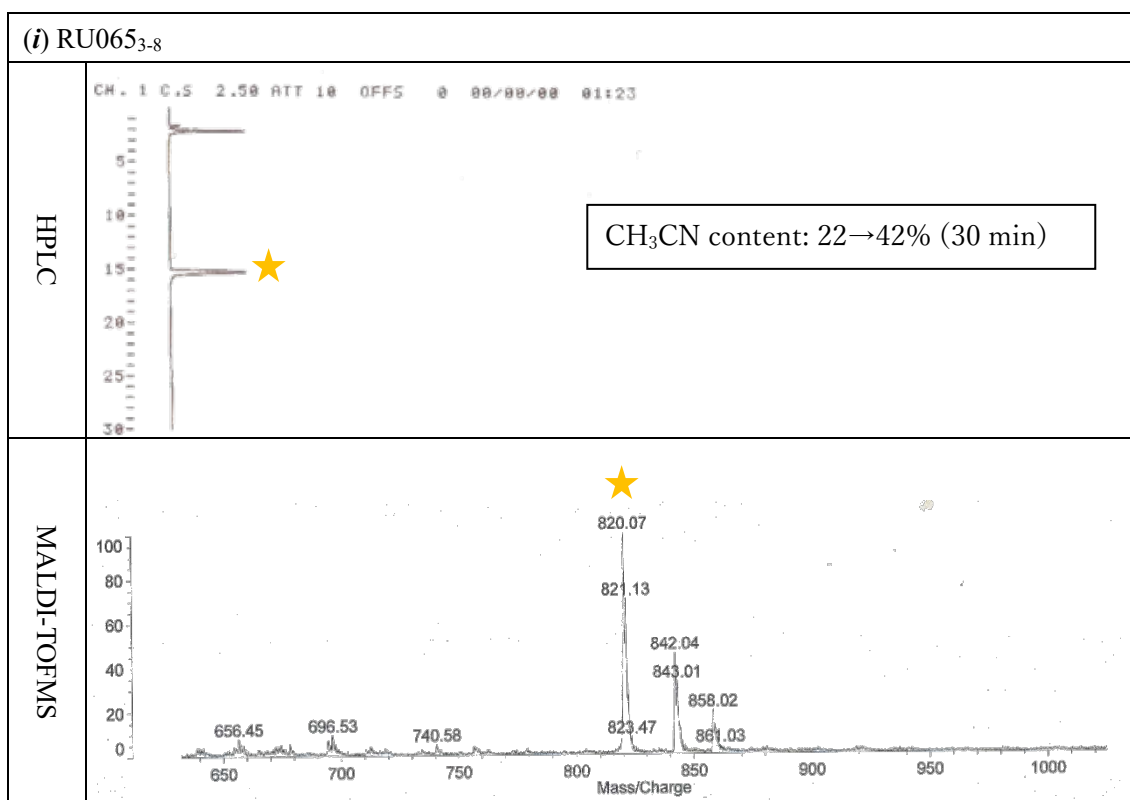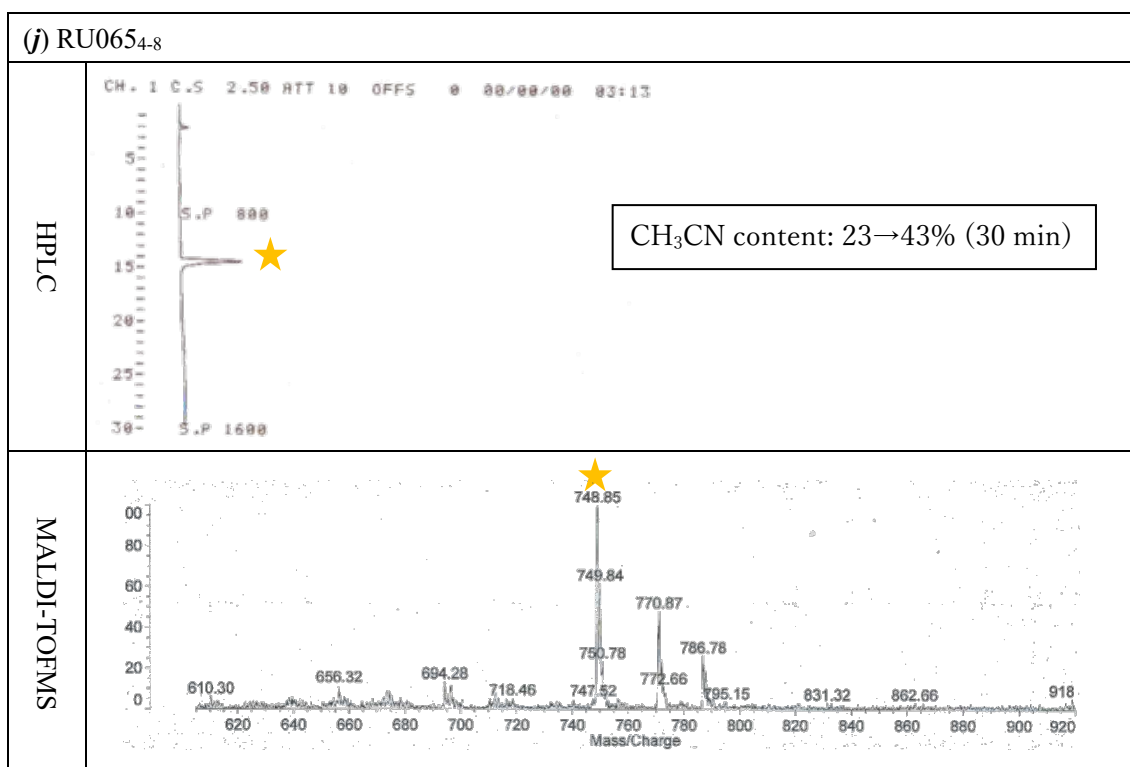

**Figure S2 (continued).** HPLC and MALDI-TOFMS data for RU065 and its fragment peptides. Inset: linear gradient of CH<sub>3</sub>CN content for 30 min.

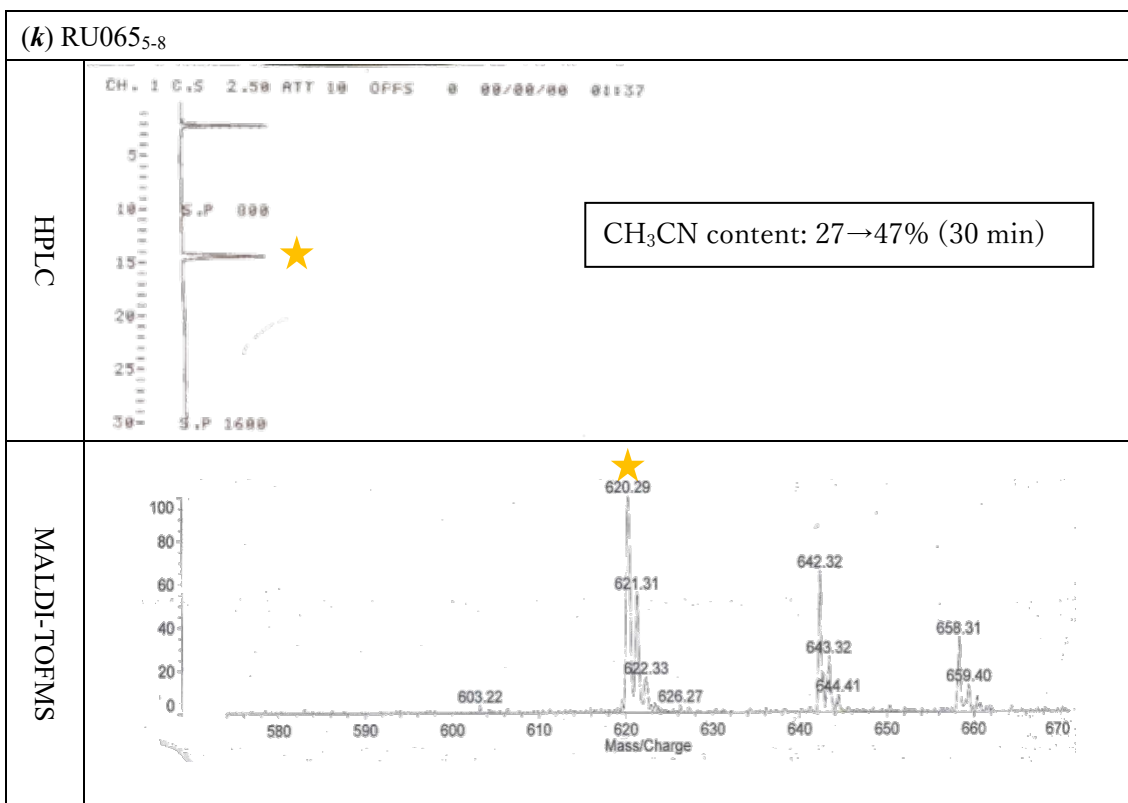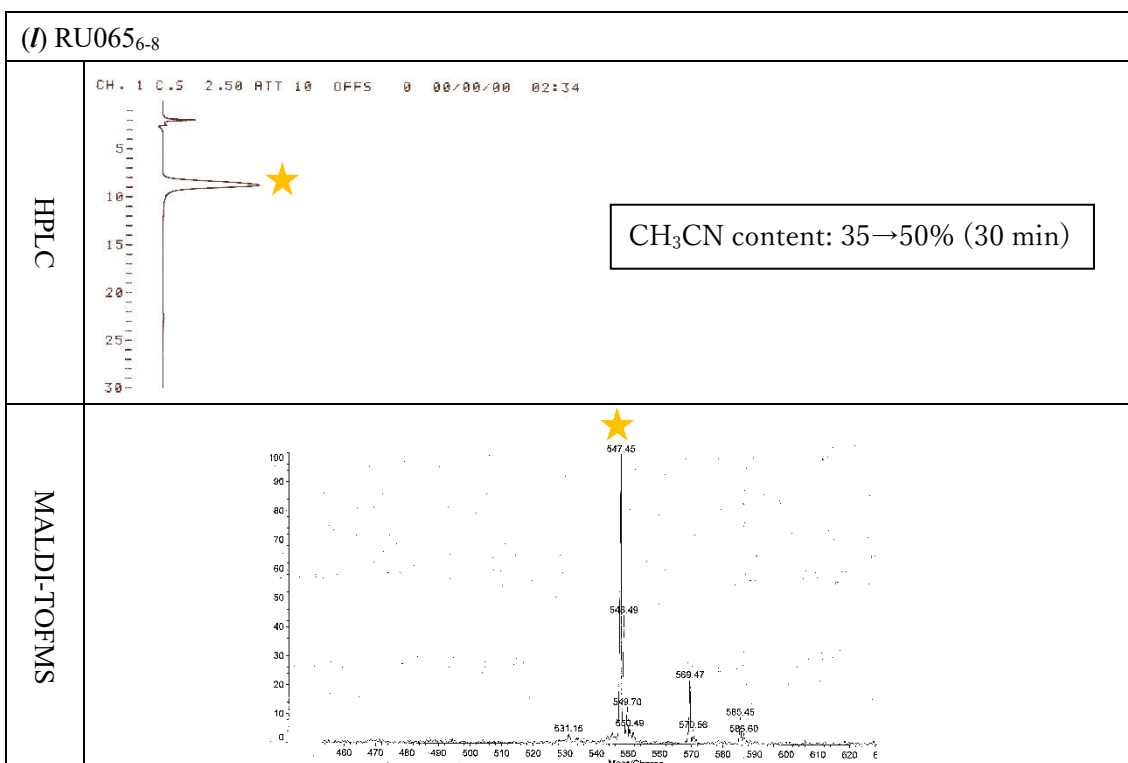

**Figure S2 (continued).** HPLC and MALDI-TOFMS data for RU065 and its fragment peptides. Inset: linear gradient of CH<sub>3</sub>CN content for 30 min.

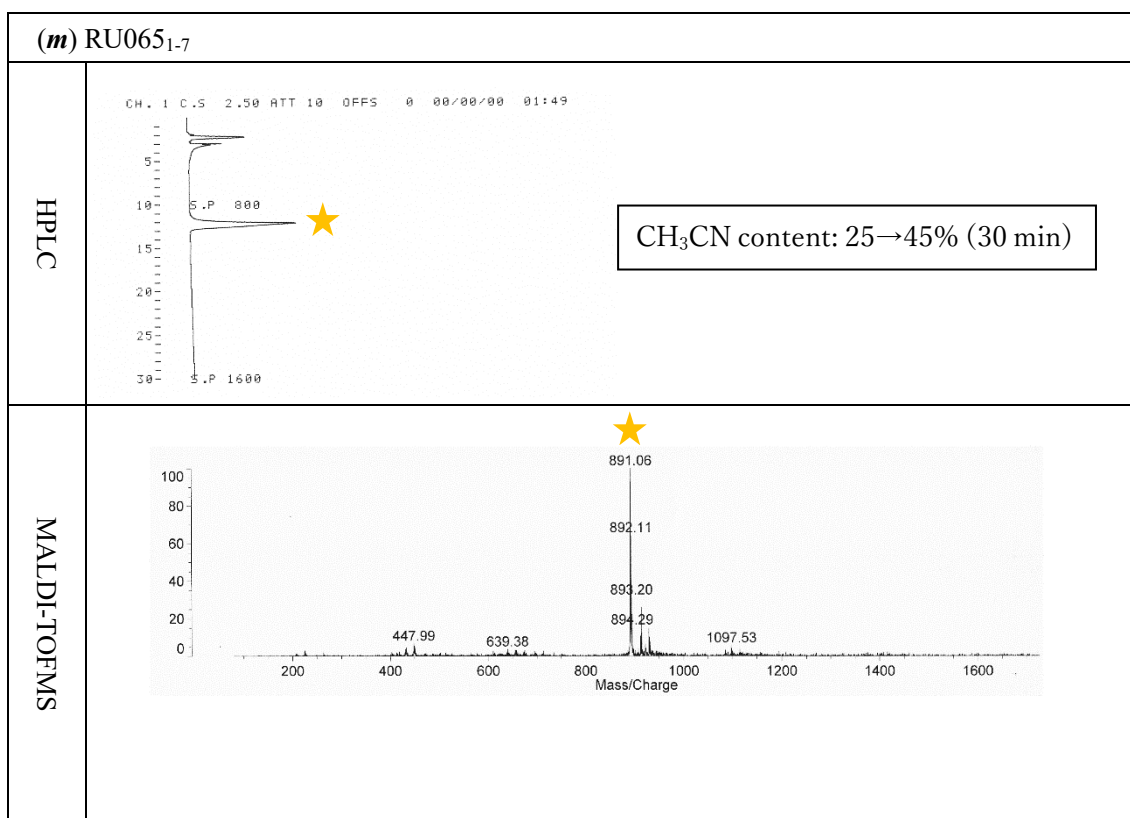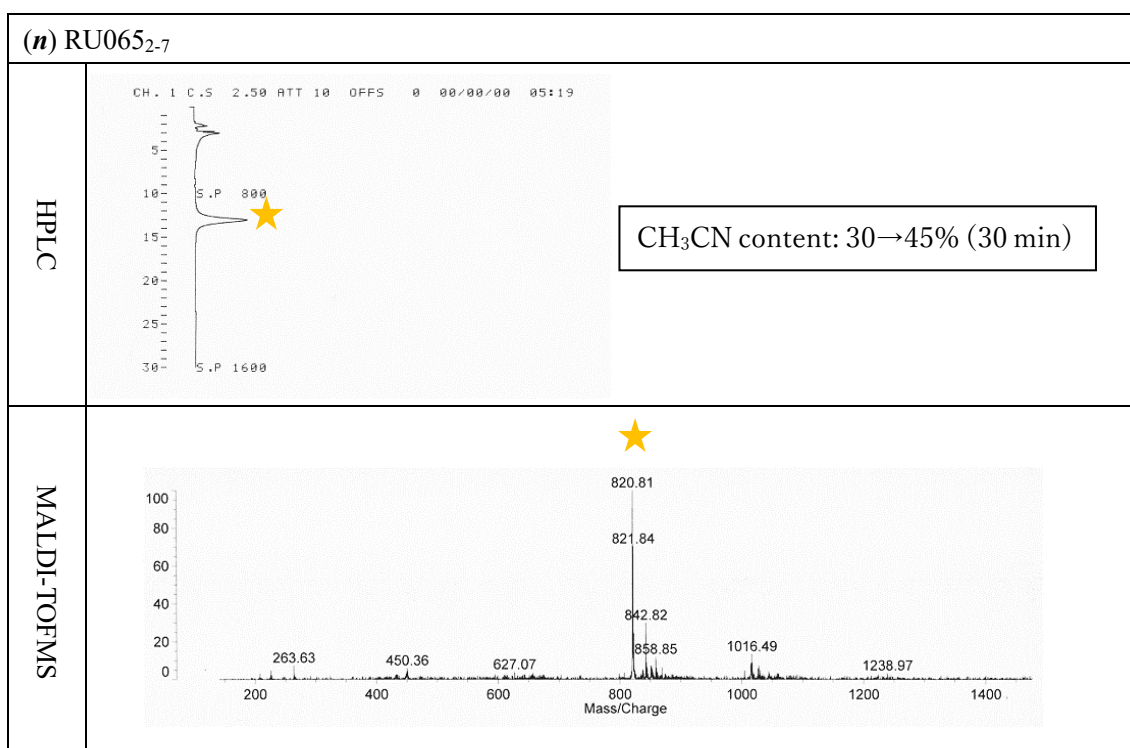

**Figure S2 (continued).** HPLC and MALDI-TOFMS data for RU065 and its fragment peptides. Inset: linear gradient of CH<sub>3</sub>CN content for 30 min.

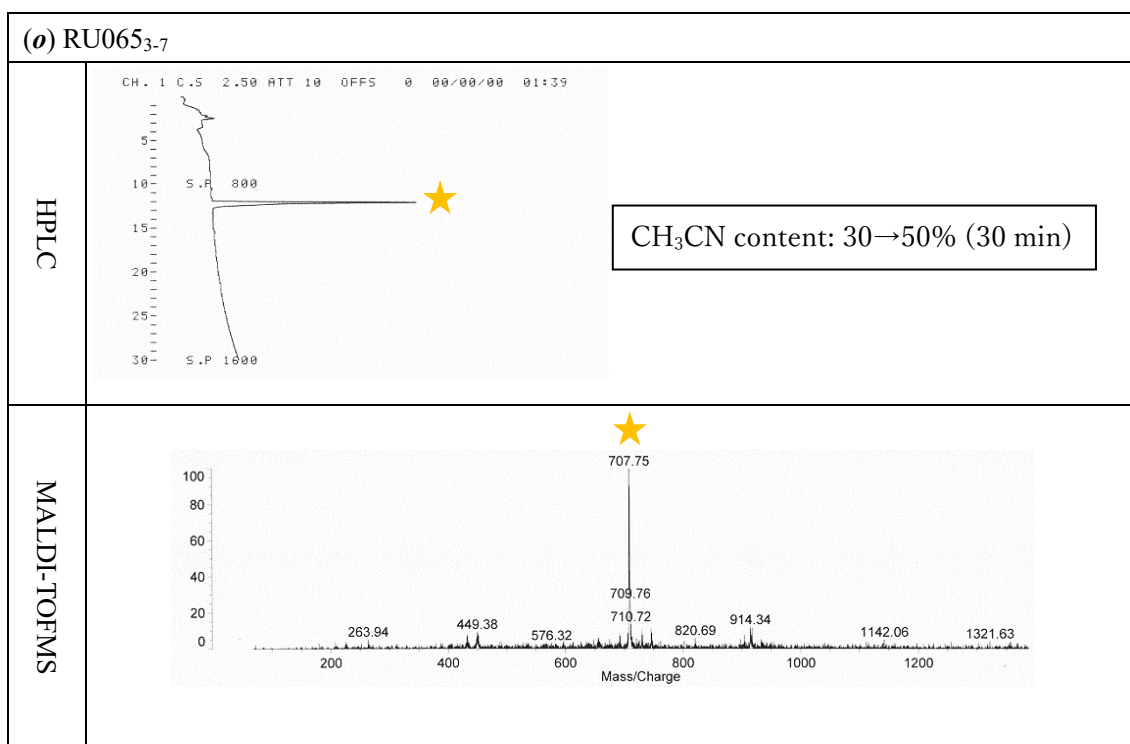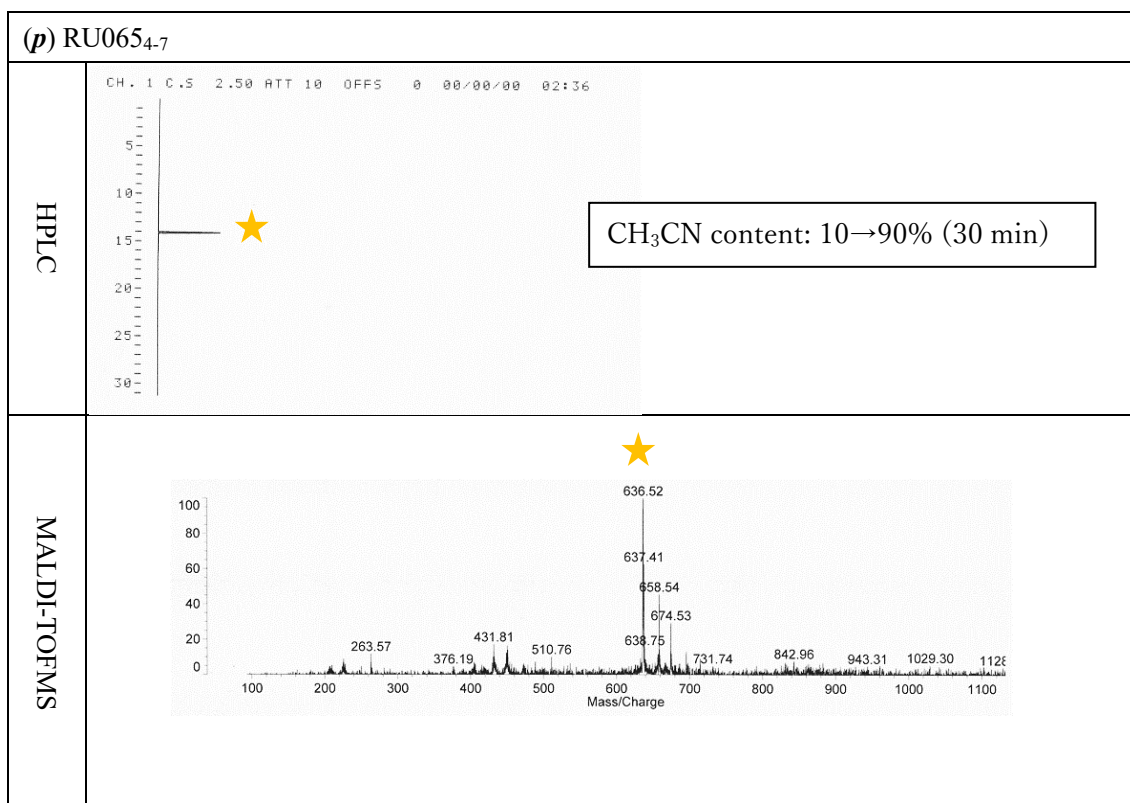

**Figure S2 (continued).** HPLC and MALDI-TOFMS data for RU065 and its fragment peptides. Inset: linear gradient of CH<sub>3</sub>CN content for 30 min.

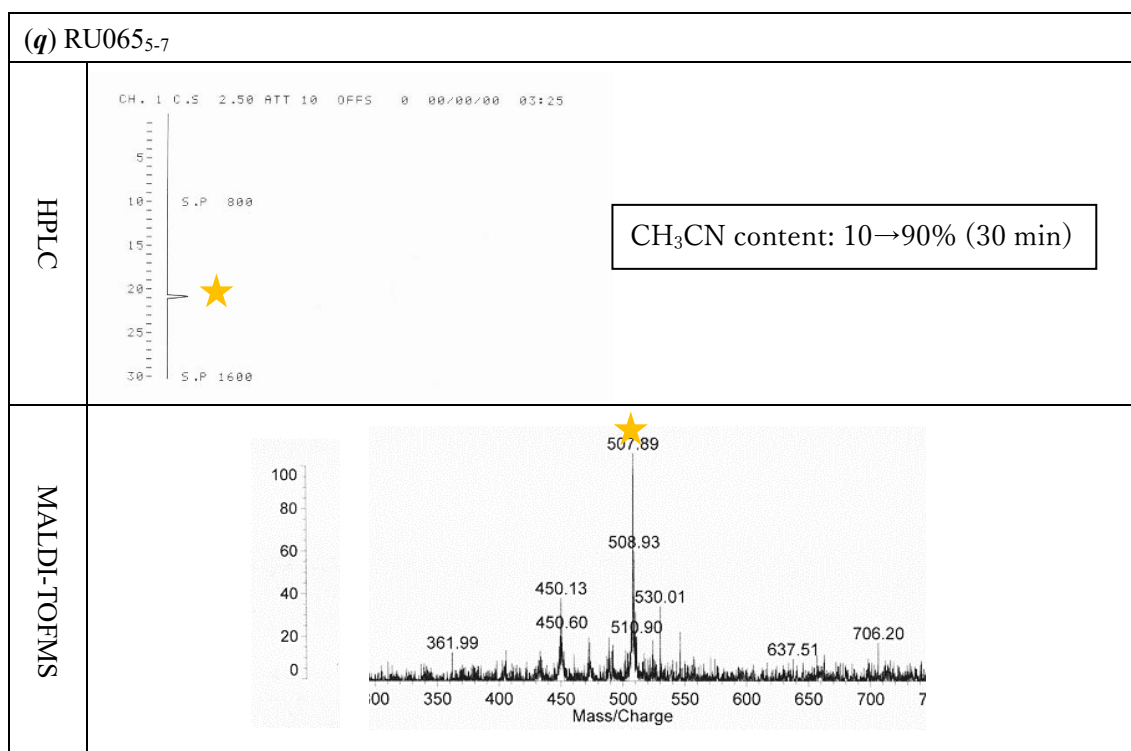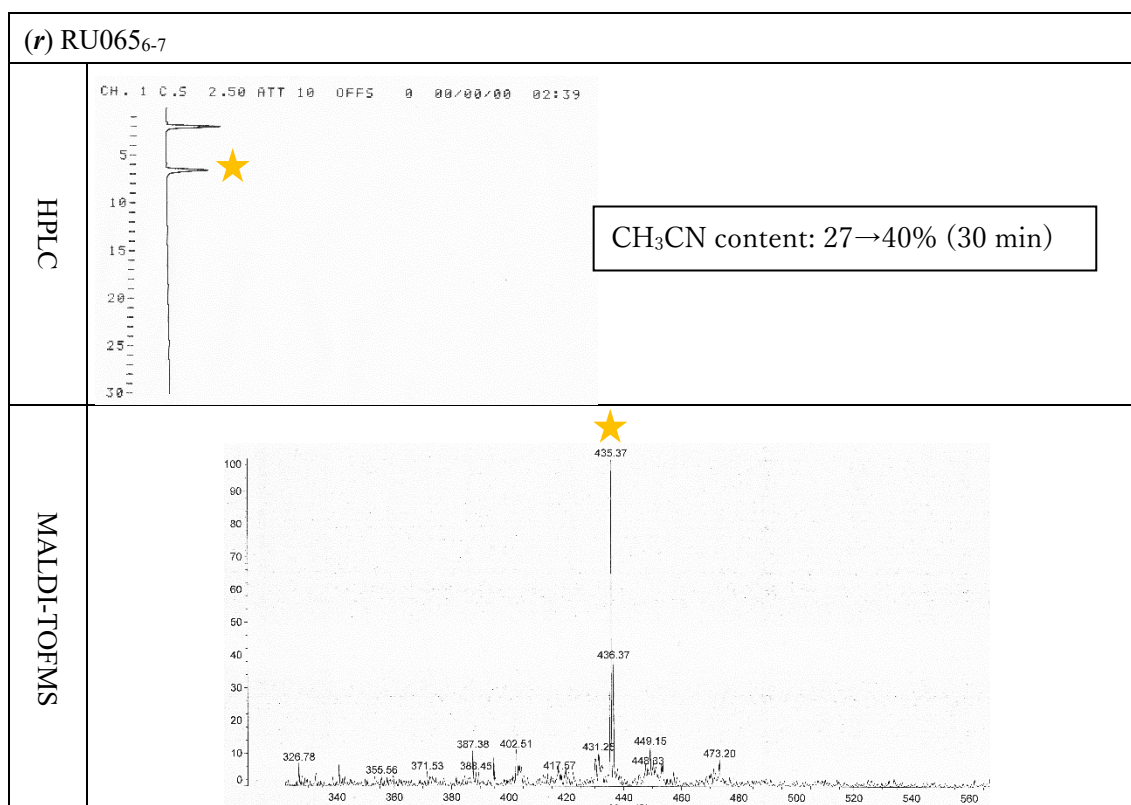

**Figure S2 (continued).** HPLC and MALDI-TOFMS data for RU065 and its fragment peptides. Inset: linear gradient of CH<sub>3</sub>CN content for 30 min.

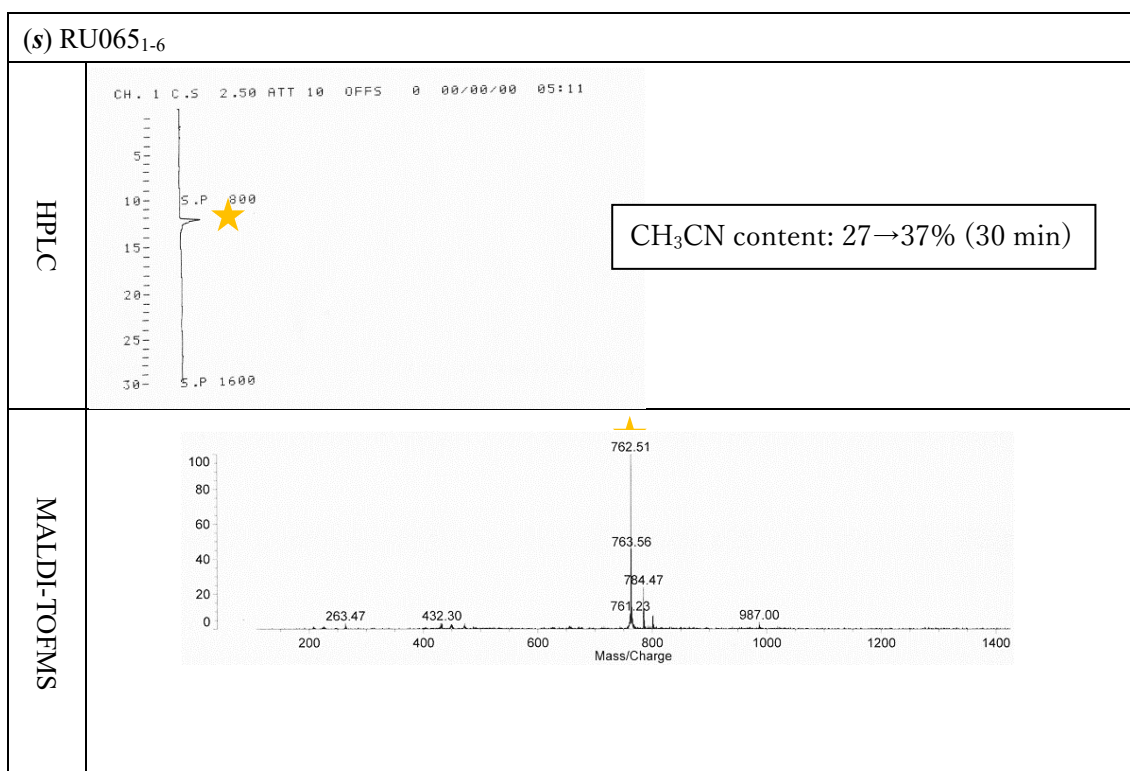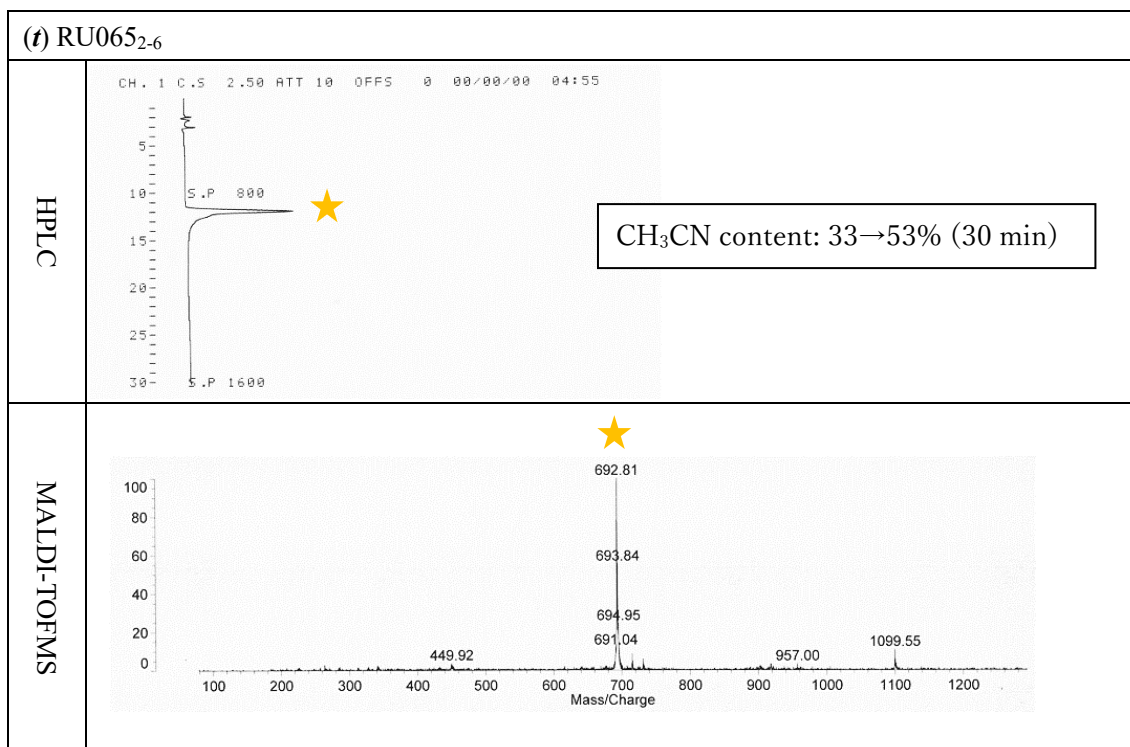

**Figure S2 (continued).** HPLC and MALDI-TOFMS data for RU065 and its fragment peptides. Inset: linear gradient of CH<sub>3</sub>CN content for 30 min.

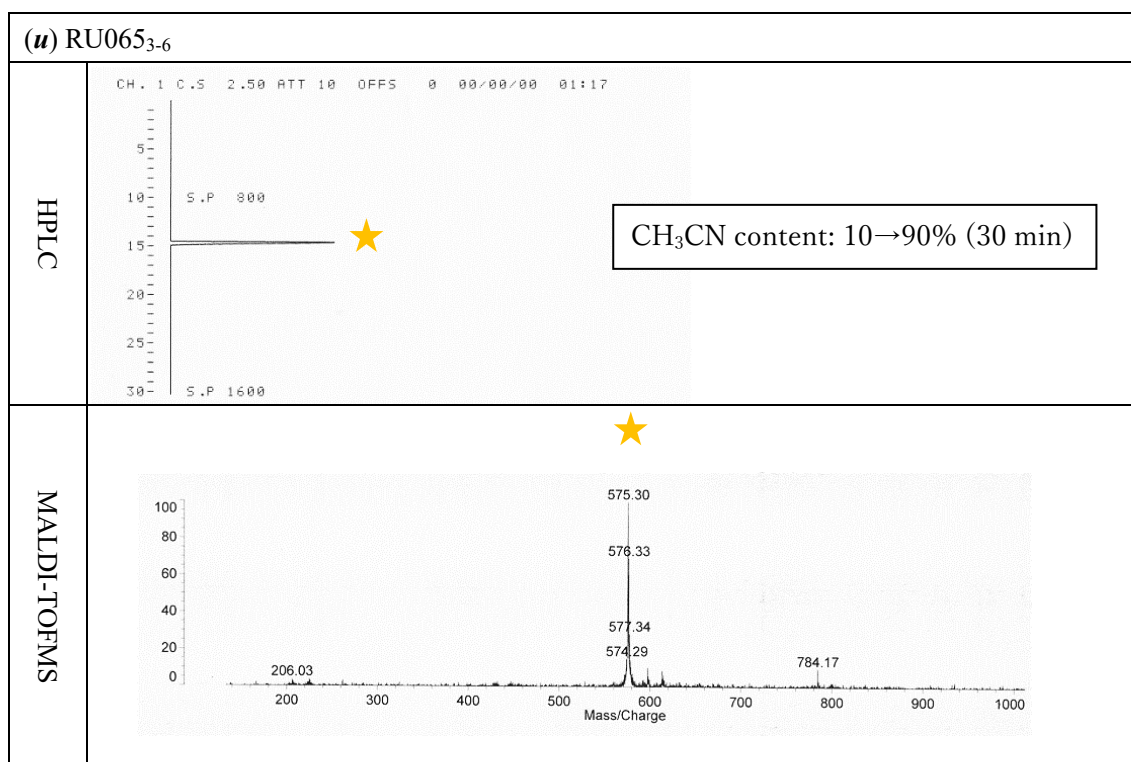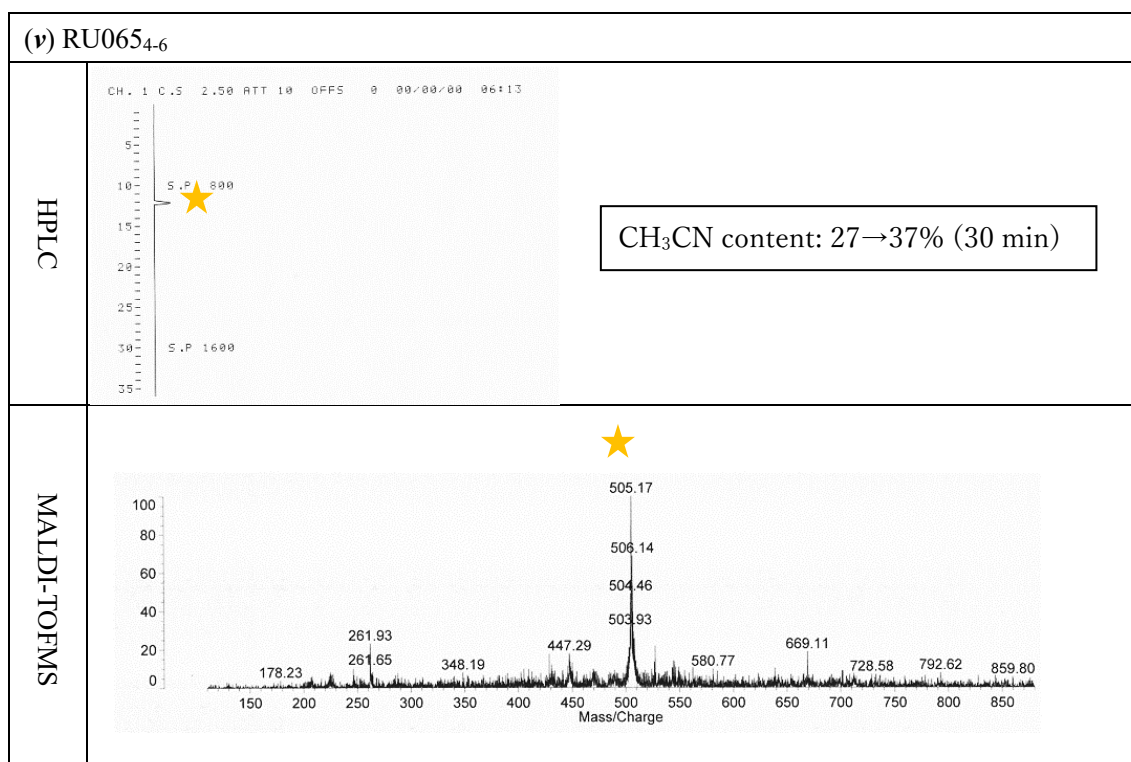

**Figure S2 (continued).** HPLC and MALDI-TOFMS data for RU065 and its fragment peptides. Inset: linear gradient of CH<sub>3</sub>CN content for 30 min.

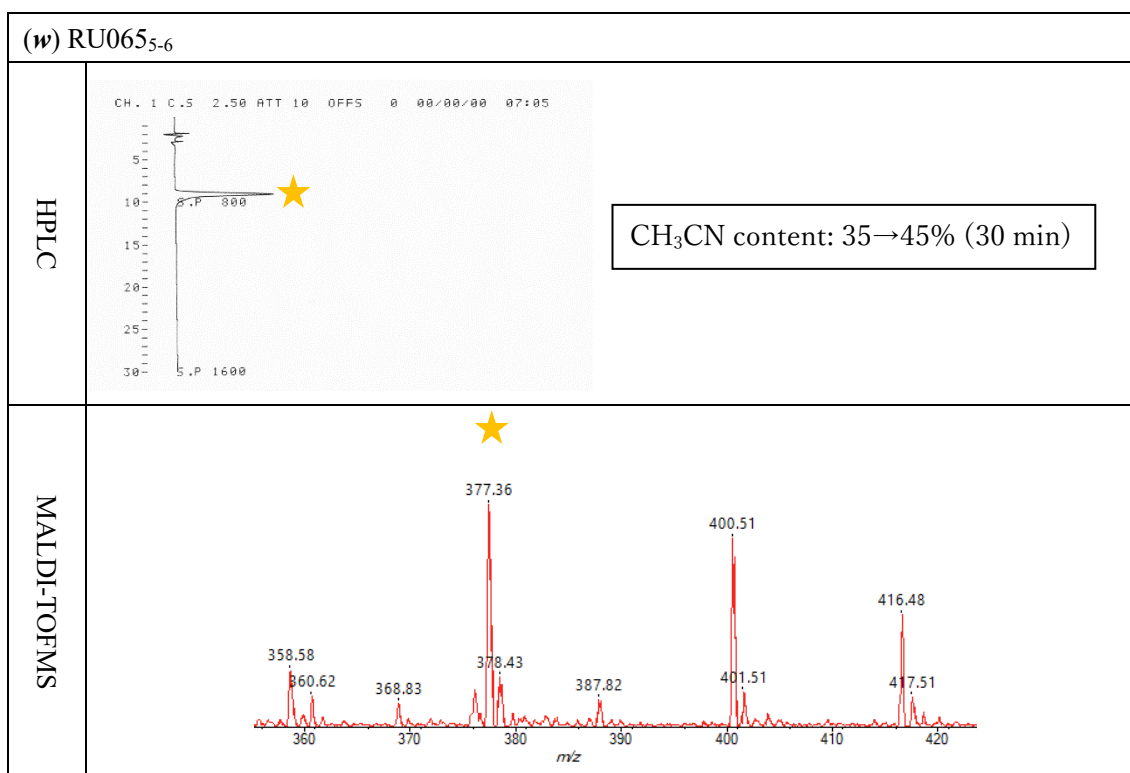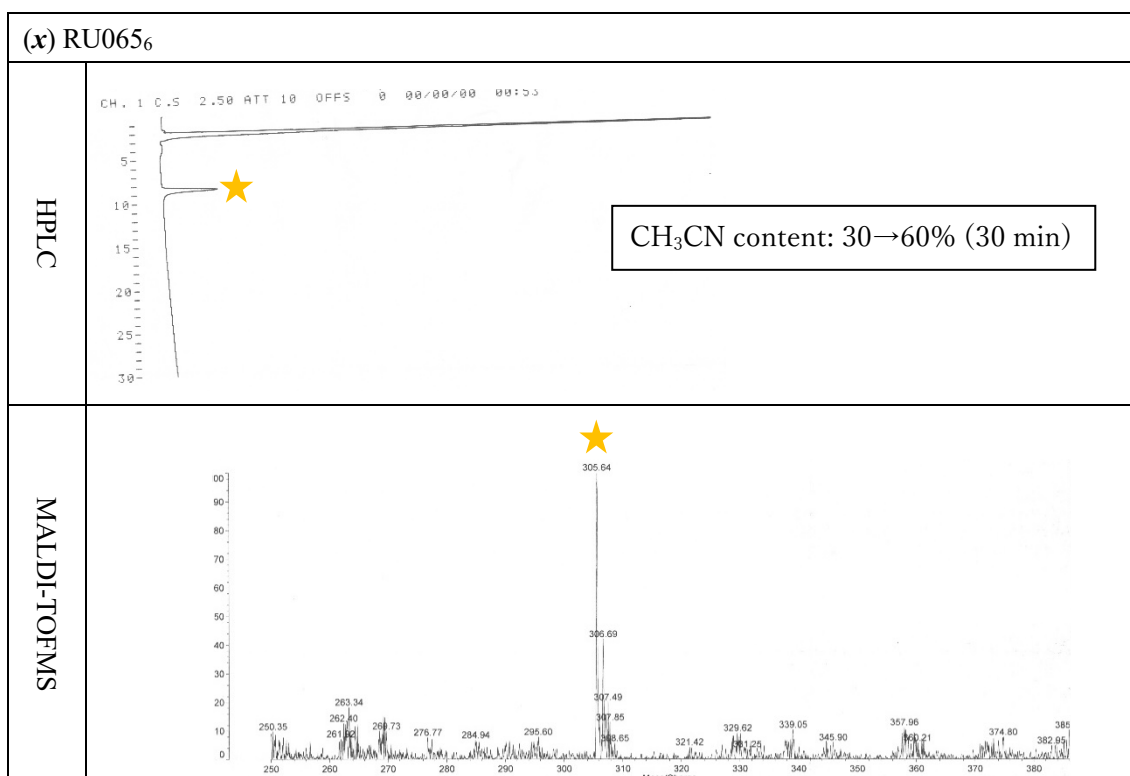

**Figure S2 (continued).** HPLC and MALDI-TOFMS data for RU065 and its fragment peptides. Inset: linear gradient of CH<sub>3</sub>CN content for 30 min.

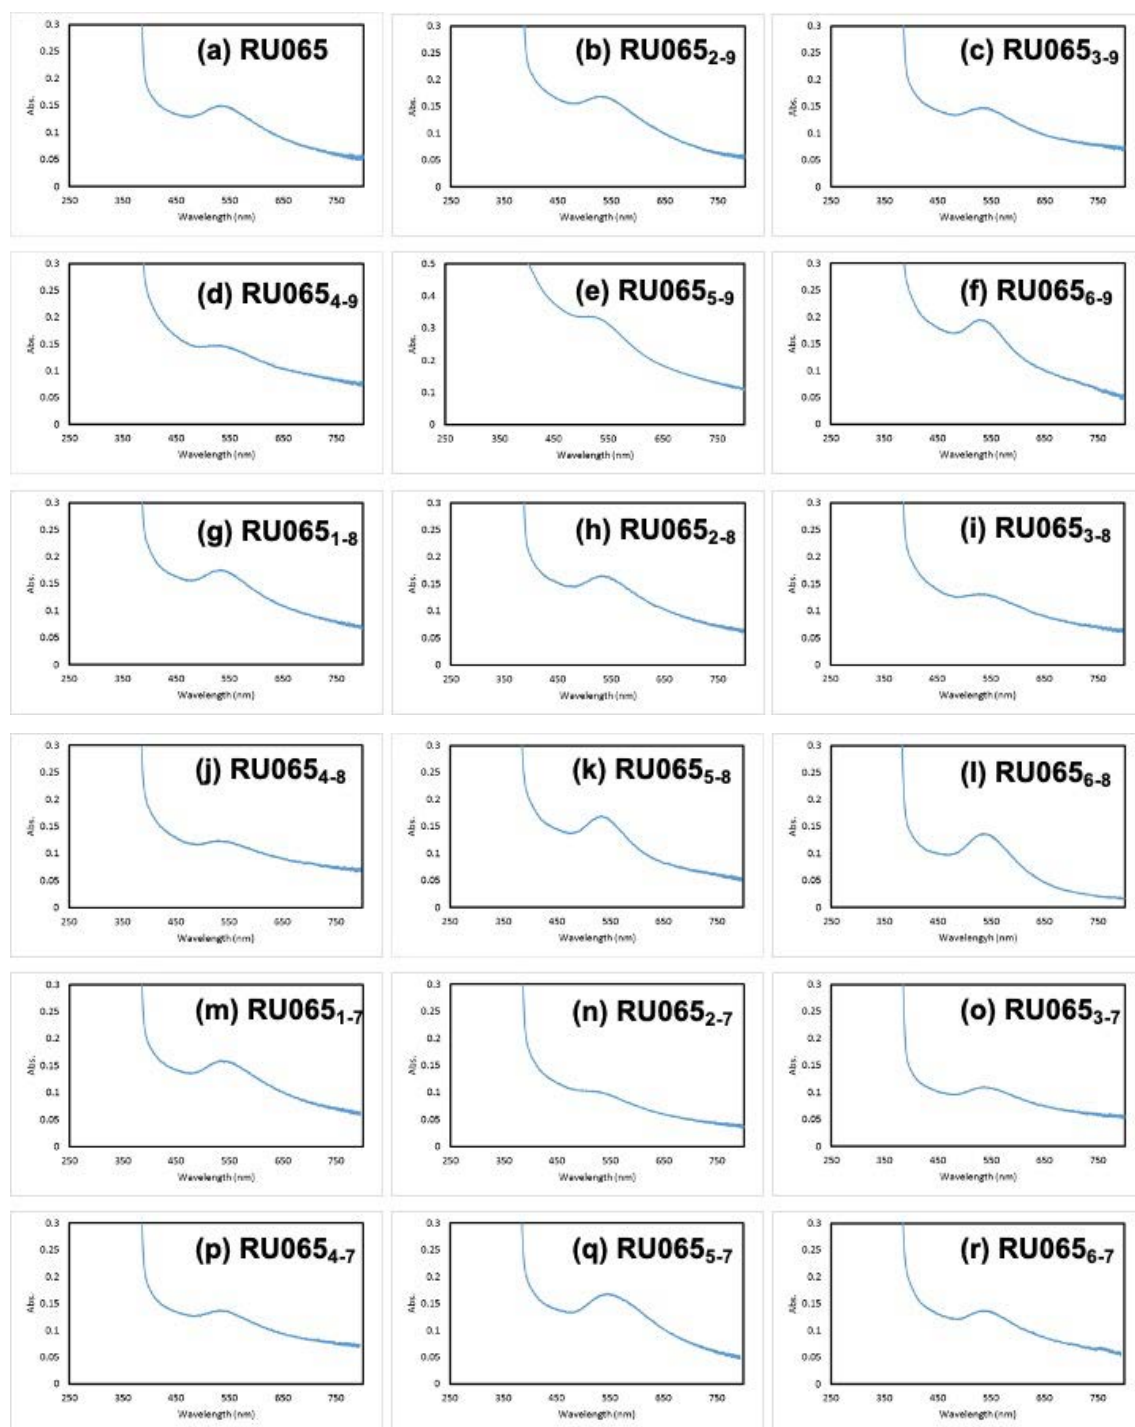

**Figure S3.** UV-vis spectra of the reaction mixtures of  $\text{HAuCl}_4$ ,  $\text{H}_2\text{PtCl}_6$ , and RU065 (or its fragment peptide).  $[\text{HAuCl}_4] = [\text{H}_2\text{PtCl}_6] = 50 \mu\text{M}$ ,  $[\text{peptide}] = 200 \mu\text{M}$  in water at  $40^\circ\text{C}$  for 1 day.

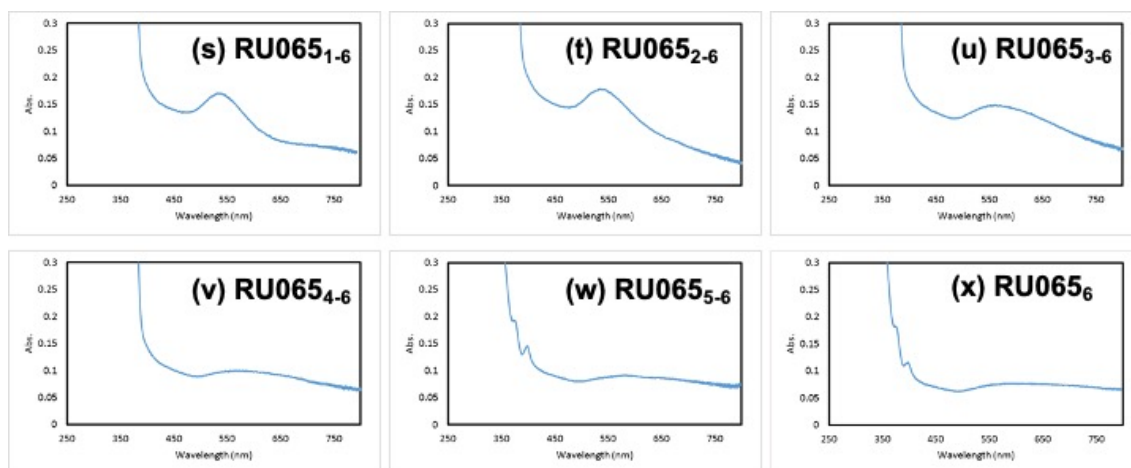

**Figure S3 (continued).** UV-vis spectra of the reaction mixtures of HAuCl<sub>4</sub>, H<sub>2</sub>PtCl<sub>6</sub>, and RU065 (or its fragment peptide). [HAuCl<sub>4</sub>] = [H<sub>2</sub>PtCl<sub>6</sub>] = 50  $\mu$ M, [peptide] = 200  $\mu$ M in water at 40  $^{\circ}$ C for 1 day.

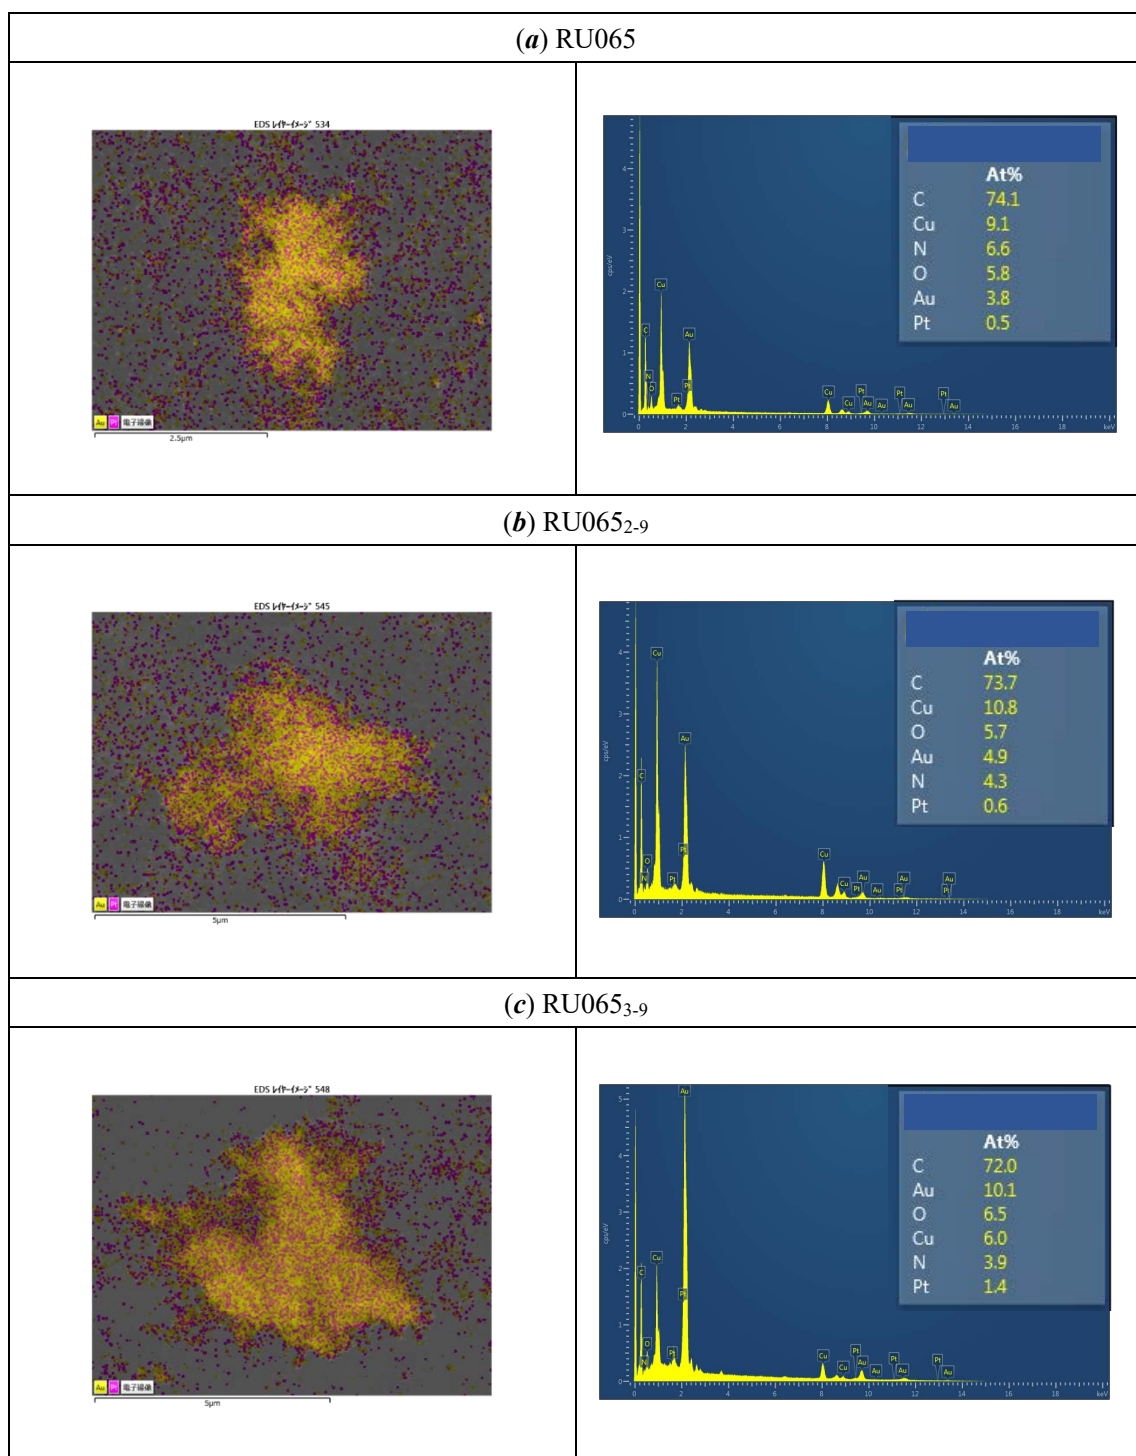

**Figure S4.** EDS-FESEM analysis of the precipitates from the reaction mixtures of  $\text{HAuCl}_4$ ,  $\text{H}_2\text{PtCl}_6$ , and RU065 (or its fragment peptide). Au and Pt distributions are colored in yellow and purple, respectively.  $[\text{Peptide}] = 2.0 \times 10^{-4} \text{ M}$  and  $[\text{HAuCl}_4] = [\text{H}_2\text{PtCl}_6] = 5.0 \times 10^{-5} \text{ M}$ , in water at  $40^\circ \text{C}$  for 1 day.

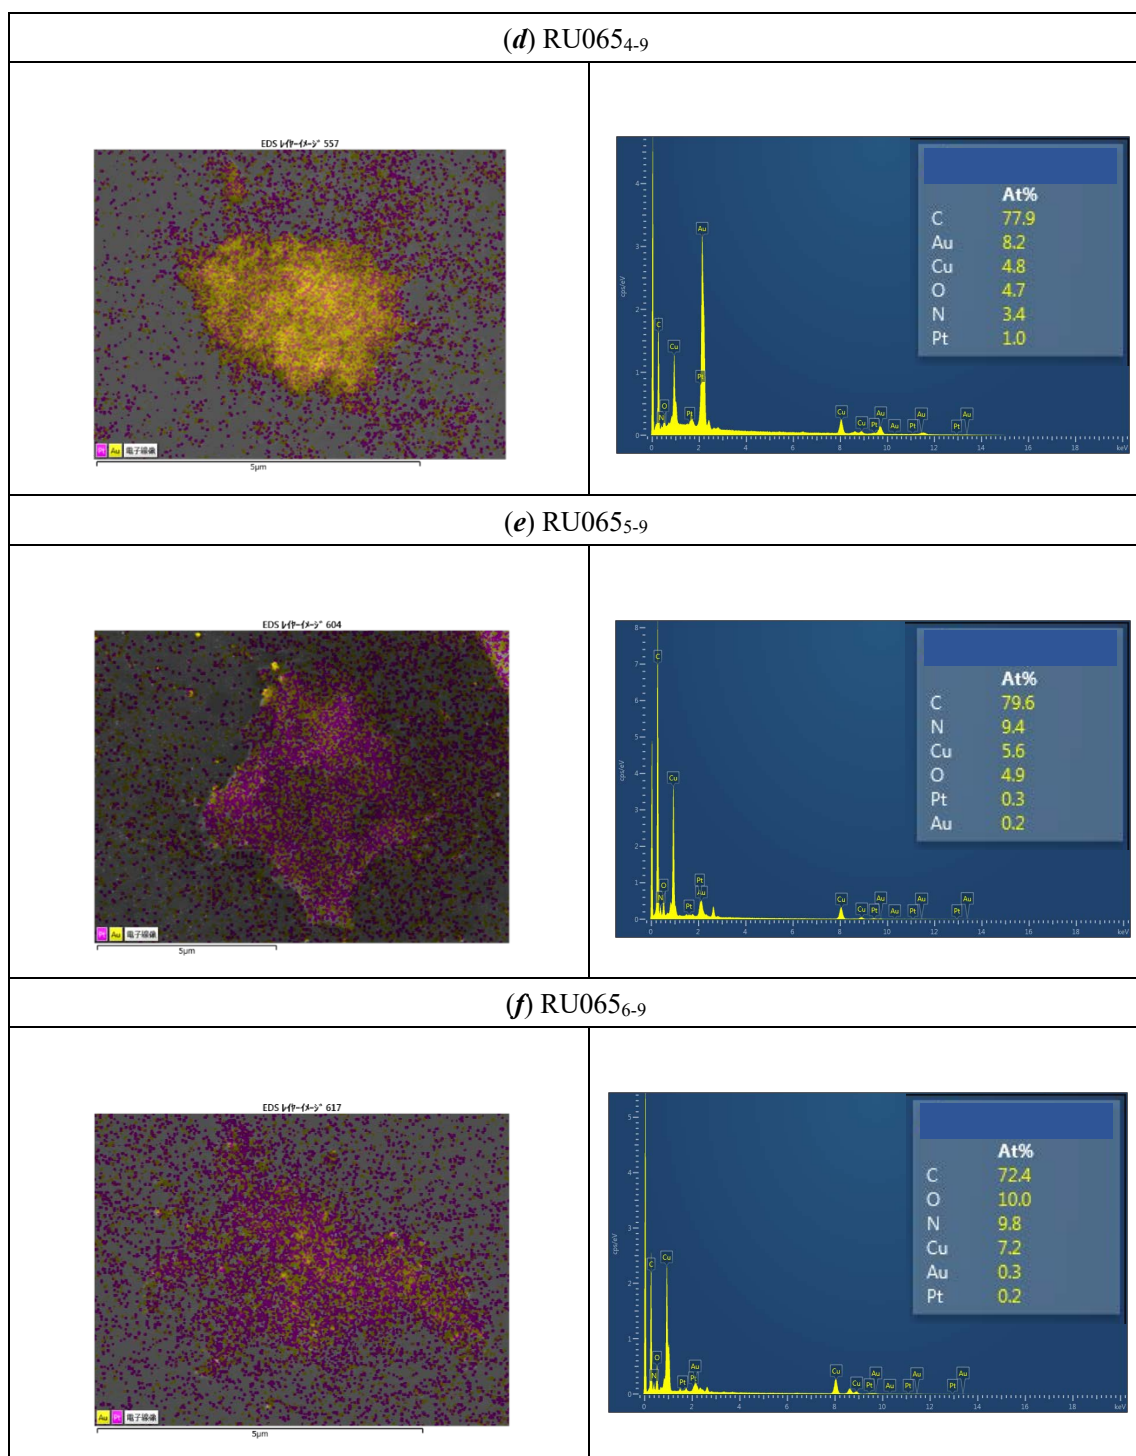

**Figure S4 (continued).** EDS-FESEM analysis of the precipitates from the reaction mixtures of HAuCl<sub>4</sub>, H<sub>2</sub>PtCl<sub>6</sub>, and RU065 (or its fragment peptide). Au and Pt distributions are colored in yellow and purple, respectively. [Peptide] =  $2.0 \times 10^{-4}$  M and [HAuCl<sub>4</sub>] = [H<sub>2</sub>PtCl<sub>6</sub>] =  $5.0 \times 10^{-5}$  M in water at 40 °C for 1 day.

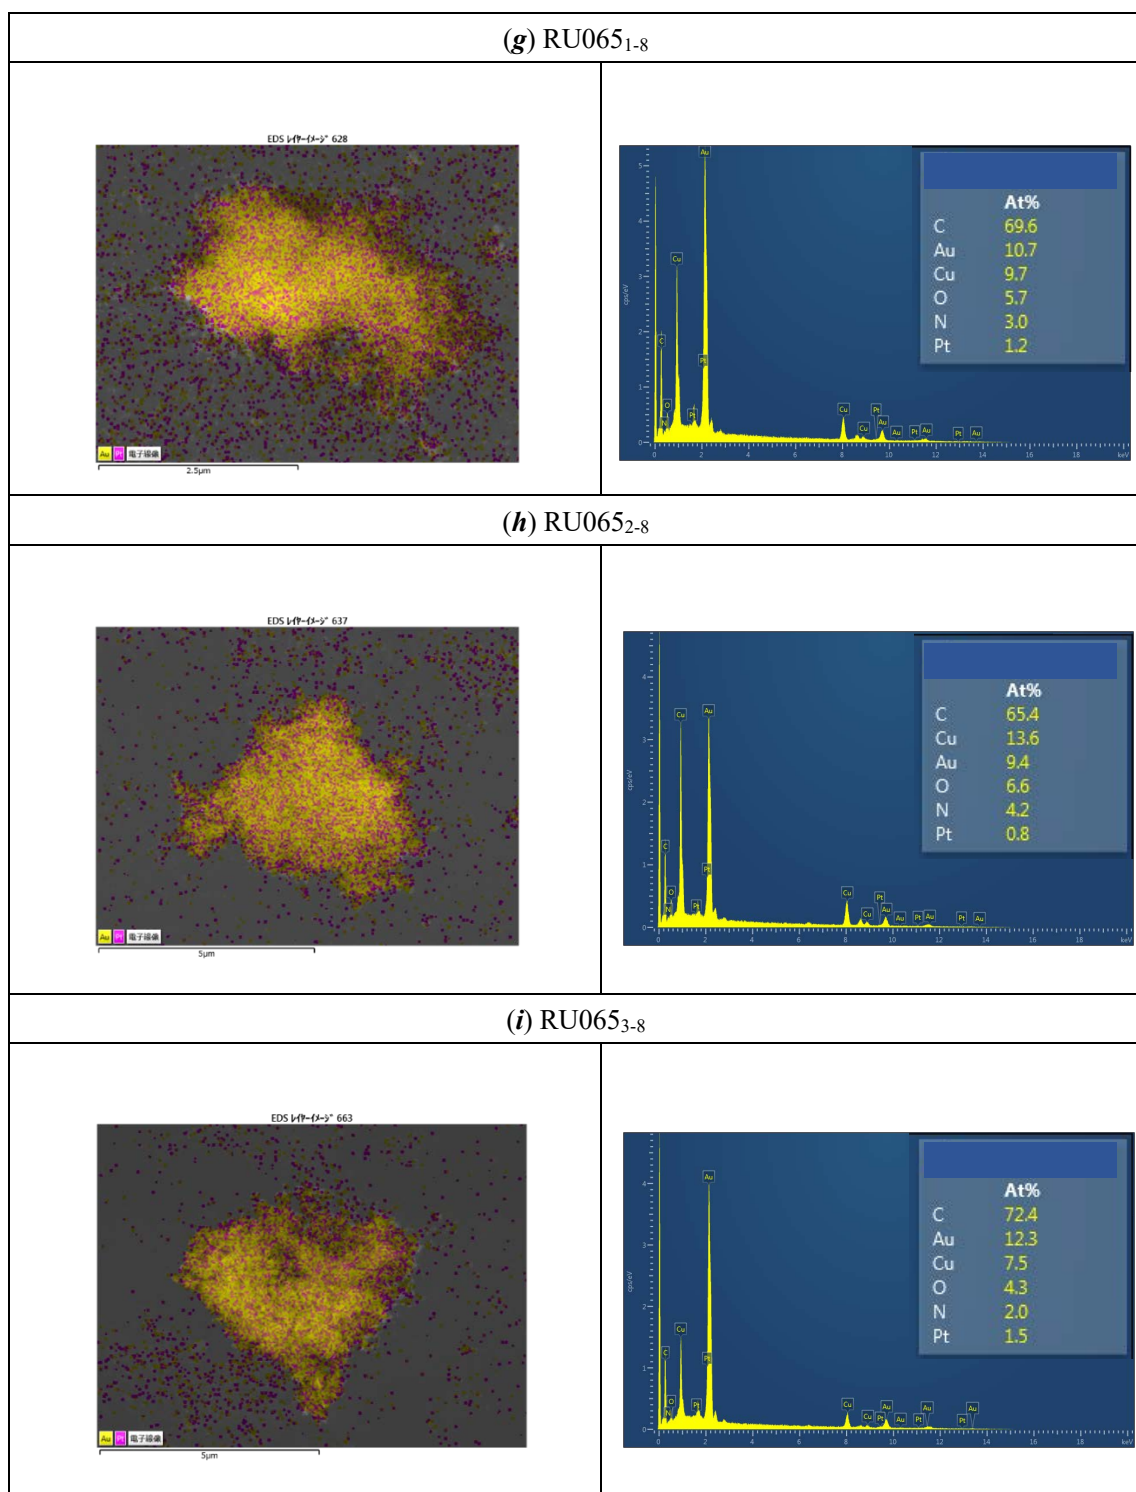

**Figure S4 (continued).** EDS-FESEM analysis of the precipitates from the reaction mixtures of HAuCl<sub>4</sub>, H<sub>2</sub>PtCl<sub>6</sub>, and RU065 (or its fragment peptide). Au and Pt distributions are colored in yellow and purple, respectively. [Peptide] =  $2.0 \times 10^{-4}$  M and [HAuCl<sub>4</sub>] = [H<sub>2</sub>PtCl<sub>6</sub>] =  $5.0 \times 10^{-5}$  M in water at 40 °C for 1 day.

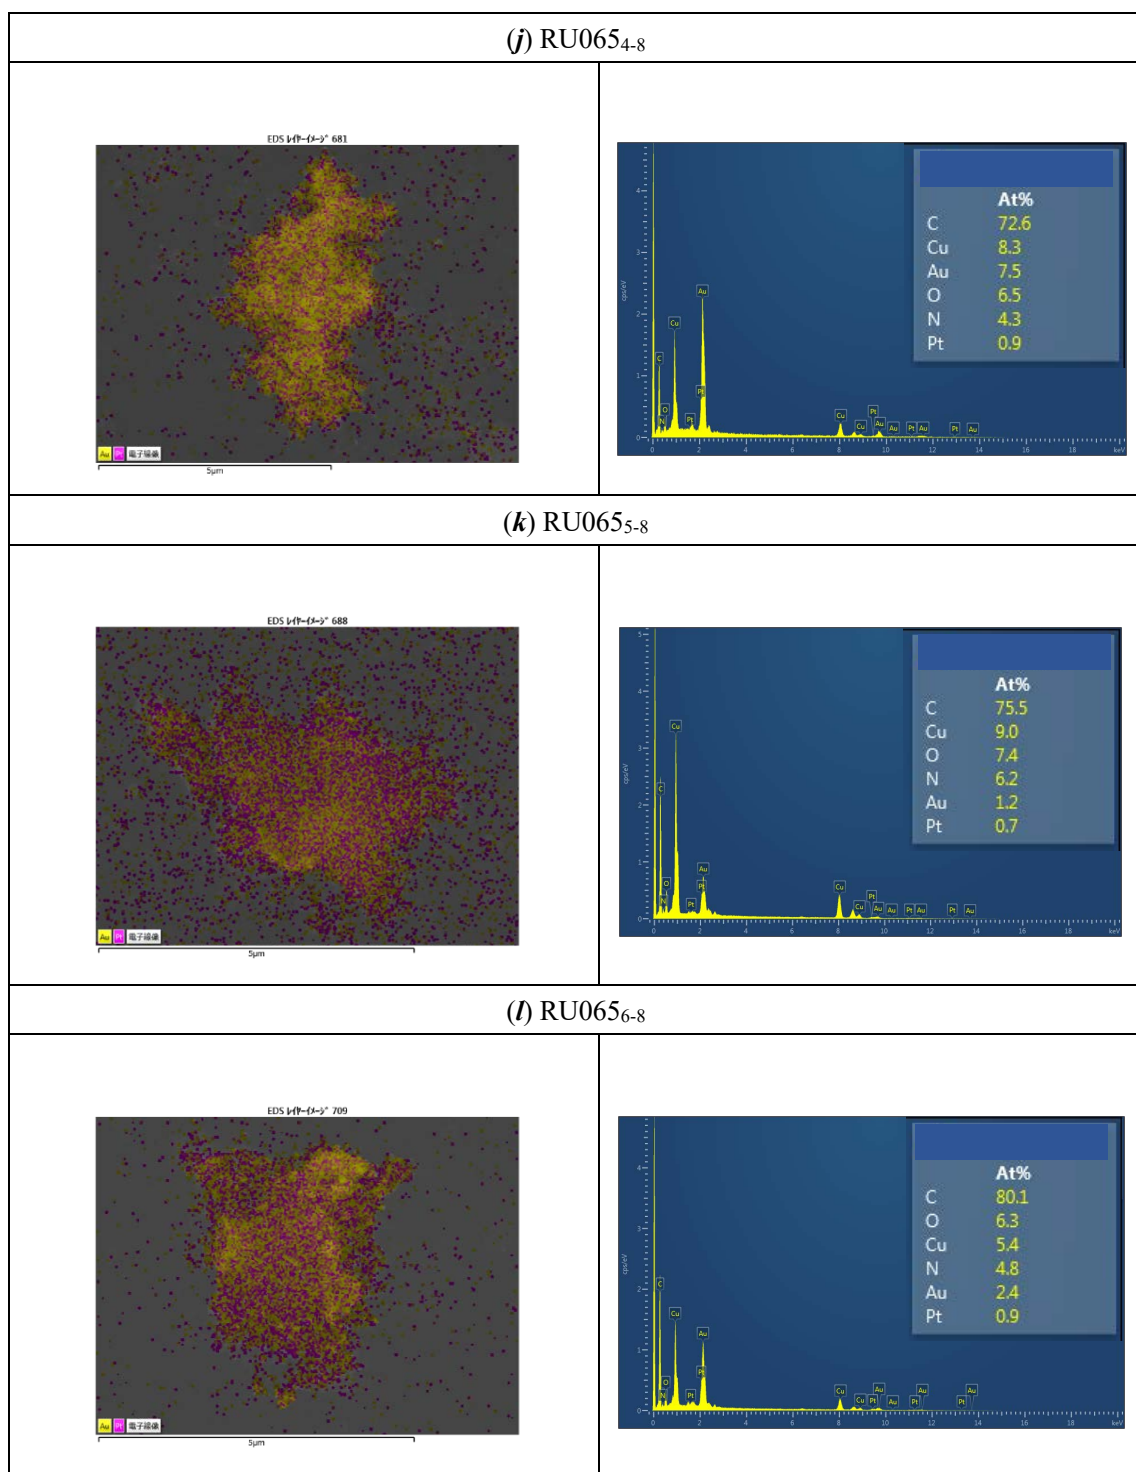

**Figure S4 (continued).** EDS-FESEM analysis of the precipitates from the reaction mixtures of  $\text{HAuCl}_4$ ,  $\text{H}_2\text{PtCl}_6$ , and RU065 (or its fragment peptide). Au and Pt distributions are colored in yellow and purple, respectively.  $[\text{Peptide}] = 2.0 \times 10^{-4} \text{ M}$  and  $[\text{HAuCl}_4] = [\text{H}_2\text{PtCl}_6] = 5.0 \times 10^{-5} \text{ M}$  in water at  $40^\circ \text{C}$  for 1 day.

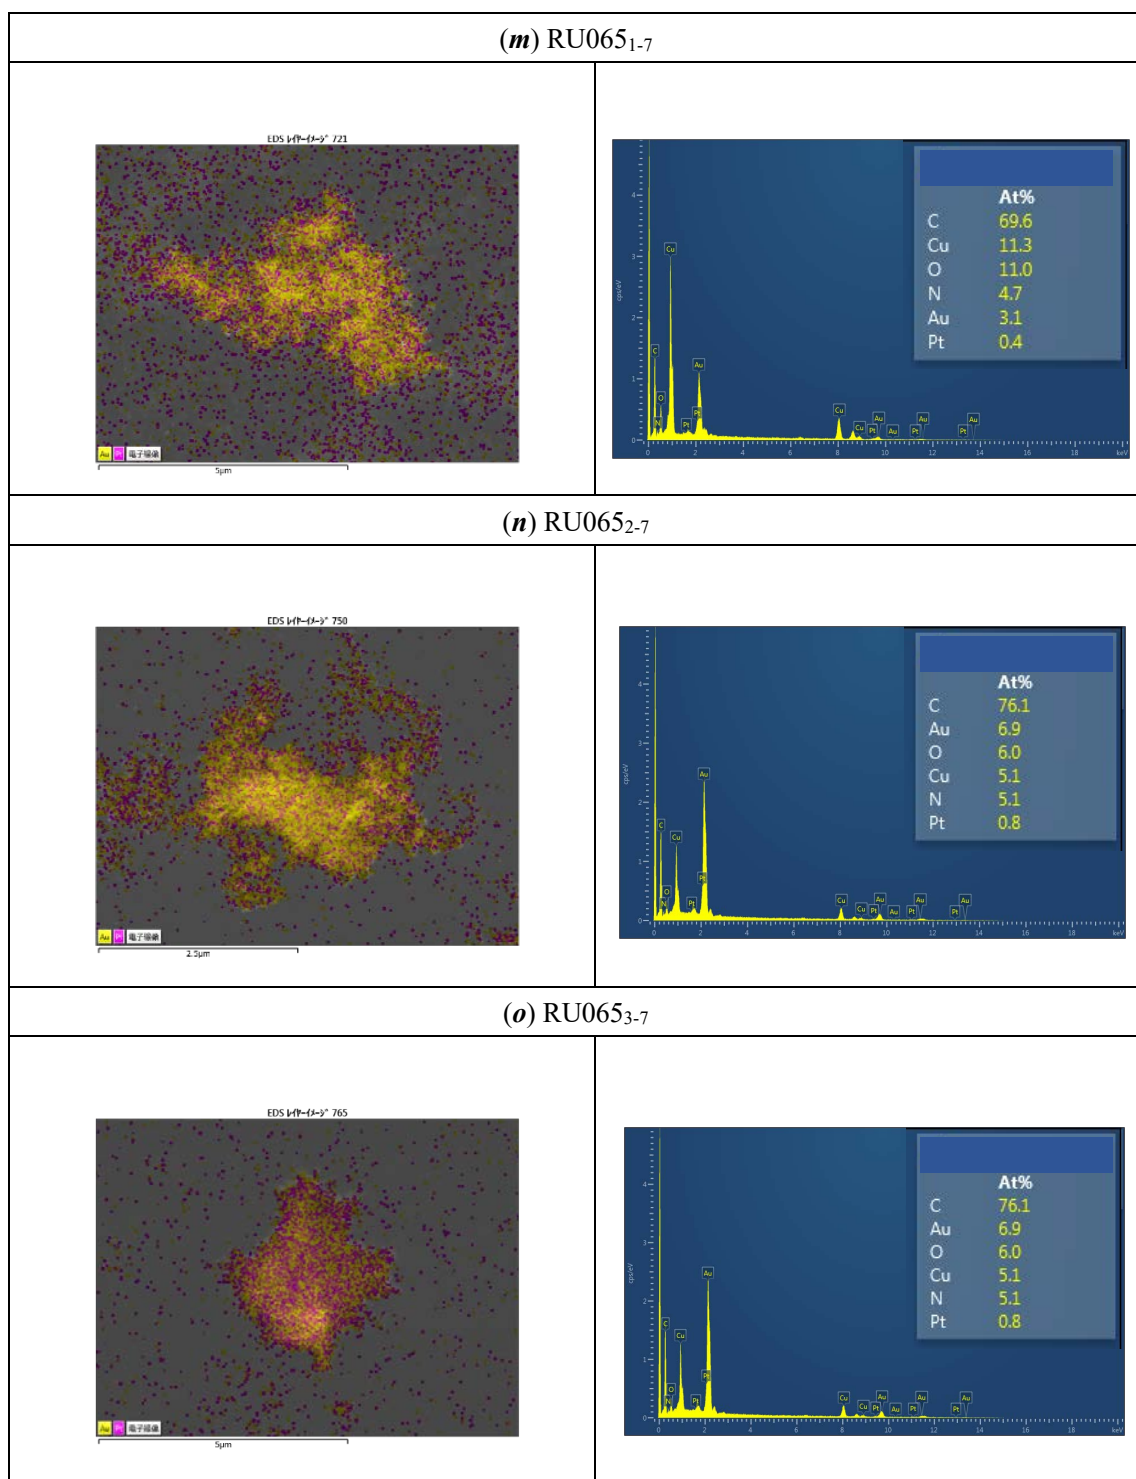

**Figure S4 (continued).** EDS-FeSEM analysis of the precipitates from the reaction mixtures of H<sub>2</sub>AuCl<sub>4</sub>, H<sub>2</sub>PtCl<sub>6</sub>, and RU065 (or its fragment peptide). Au and Pt distributions are colored in yellow and purple, respectively. [Peptide] = 2.0 × 10<sup>-4</sup> M and [H<sub>2</sub>AuCl<sub>4</sub>] = [H<sub>2</sub>PtCl<sub>6</sub>] = 5.0 × 10<sup>-5</sup> M in water at 40 °C for 1 day.

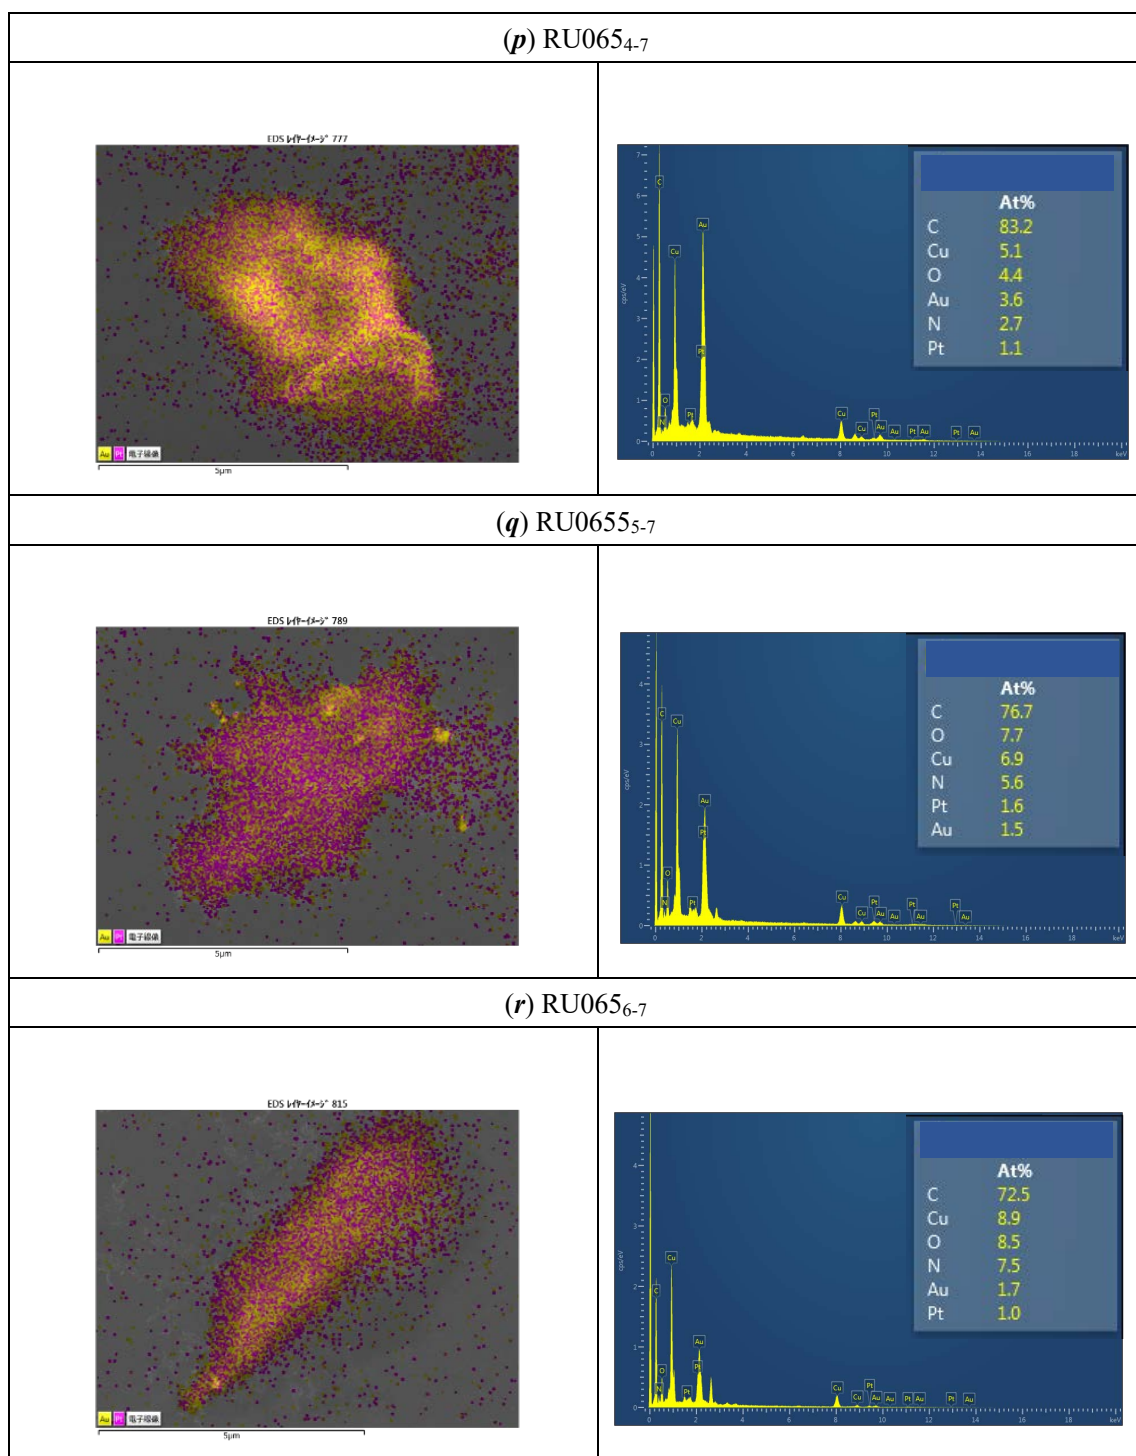

**Figure S4 (continued).** EDS-FESEM analysis of the precipitates from the reaction mixtures of HAuCl<sub>4</sub>, H<sub>2</sub>PtCl<sub>6</sub>, and RU065 (or its fragment peptide). Au and Pt distributions are colored in yellow and purple, respectively. [Peptide] =  $2.0 \times 10^{-4}$  M and [HAuCl<sub>4</sub>] = [H<sub>2</sub>PtCl<sub>6</sub>] =  $5.0 \times 10^{-5}$  M in water at 40 °C for 1 day.

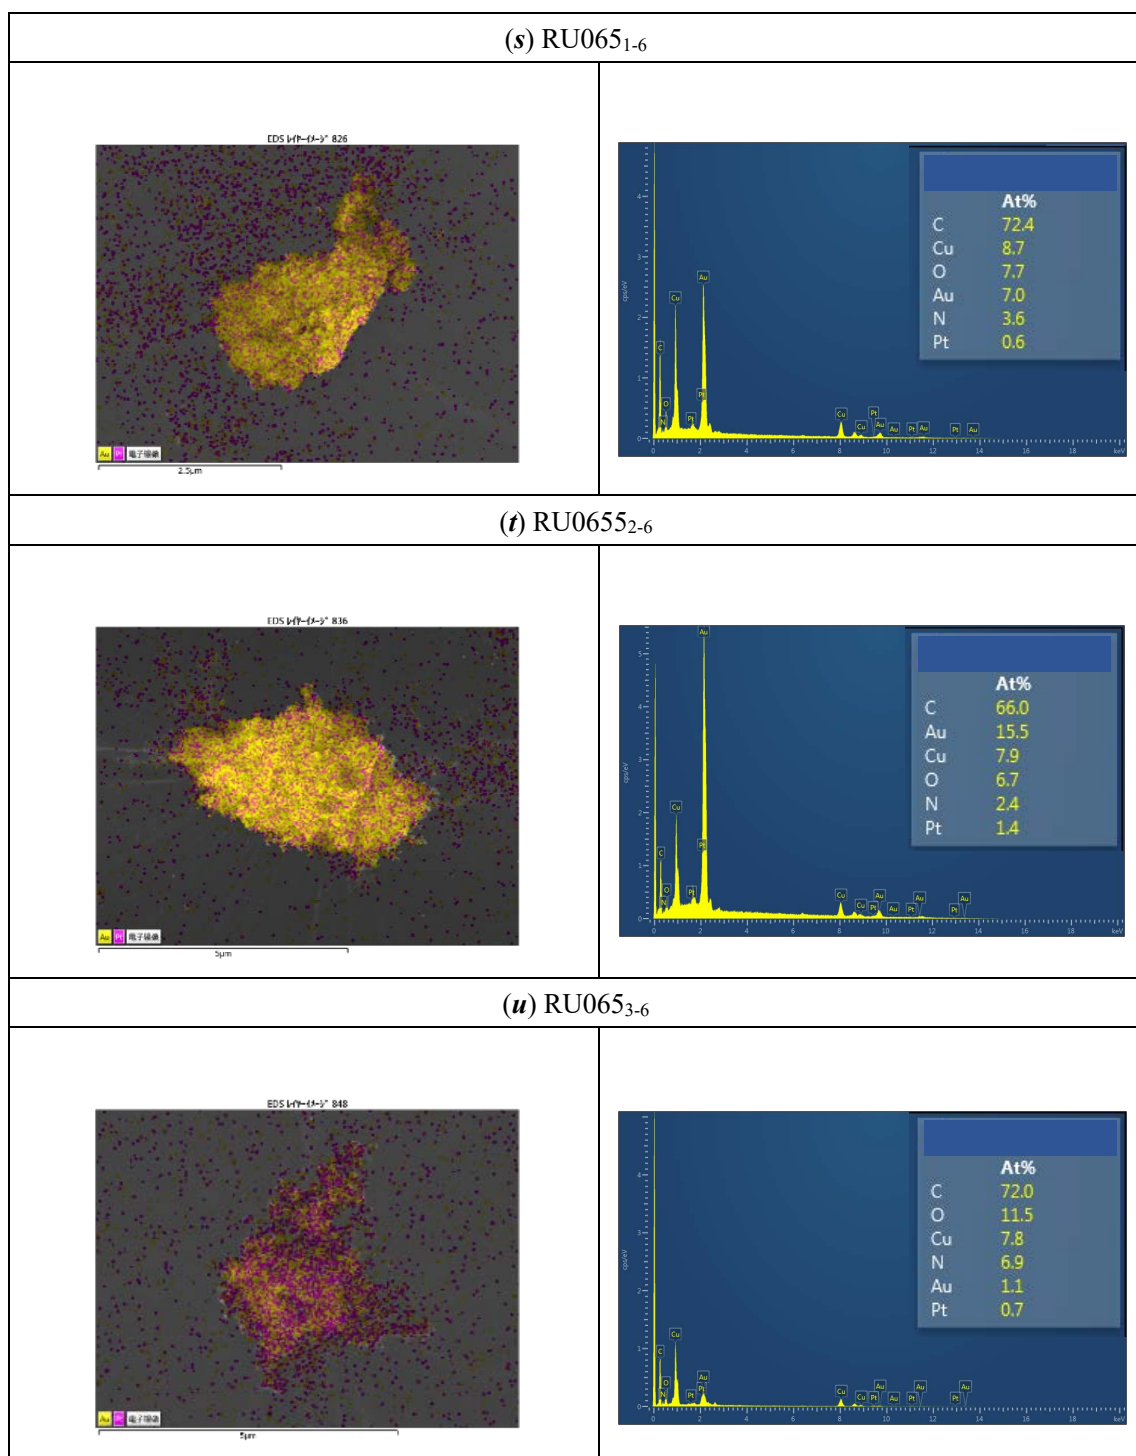

**Figure S4 (continued).** EDS-FESEM analysis of the precipitates from the reaction mixtures of H<sub>2</sub>AuCl<sub>4</sub>, H<sub>2</sub>PtCl<sub>6</sub>, and RU065 (or its fragment peptide). Au and Pt distributions are colored in yellow and purple, respectively. [Peptide] =  $2.0 \times 10^{-4}$  M and [H<sub>2</sub>AuCl<sub>4</sub>] = [H<sub>2</sub>PtCl<sub>6</sub>] =  $5.0 \times 10^{-5}$  M in water at 40 °C for 1 day.

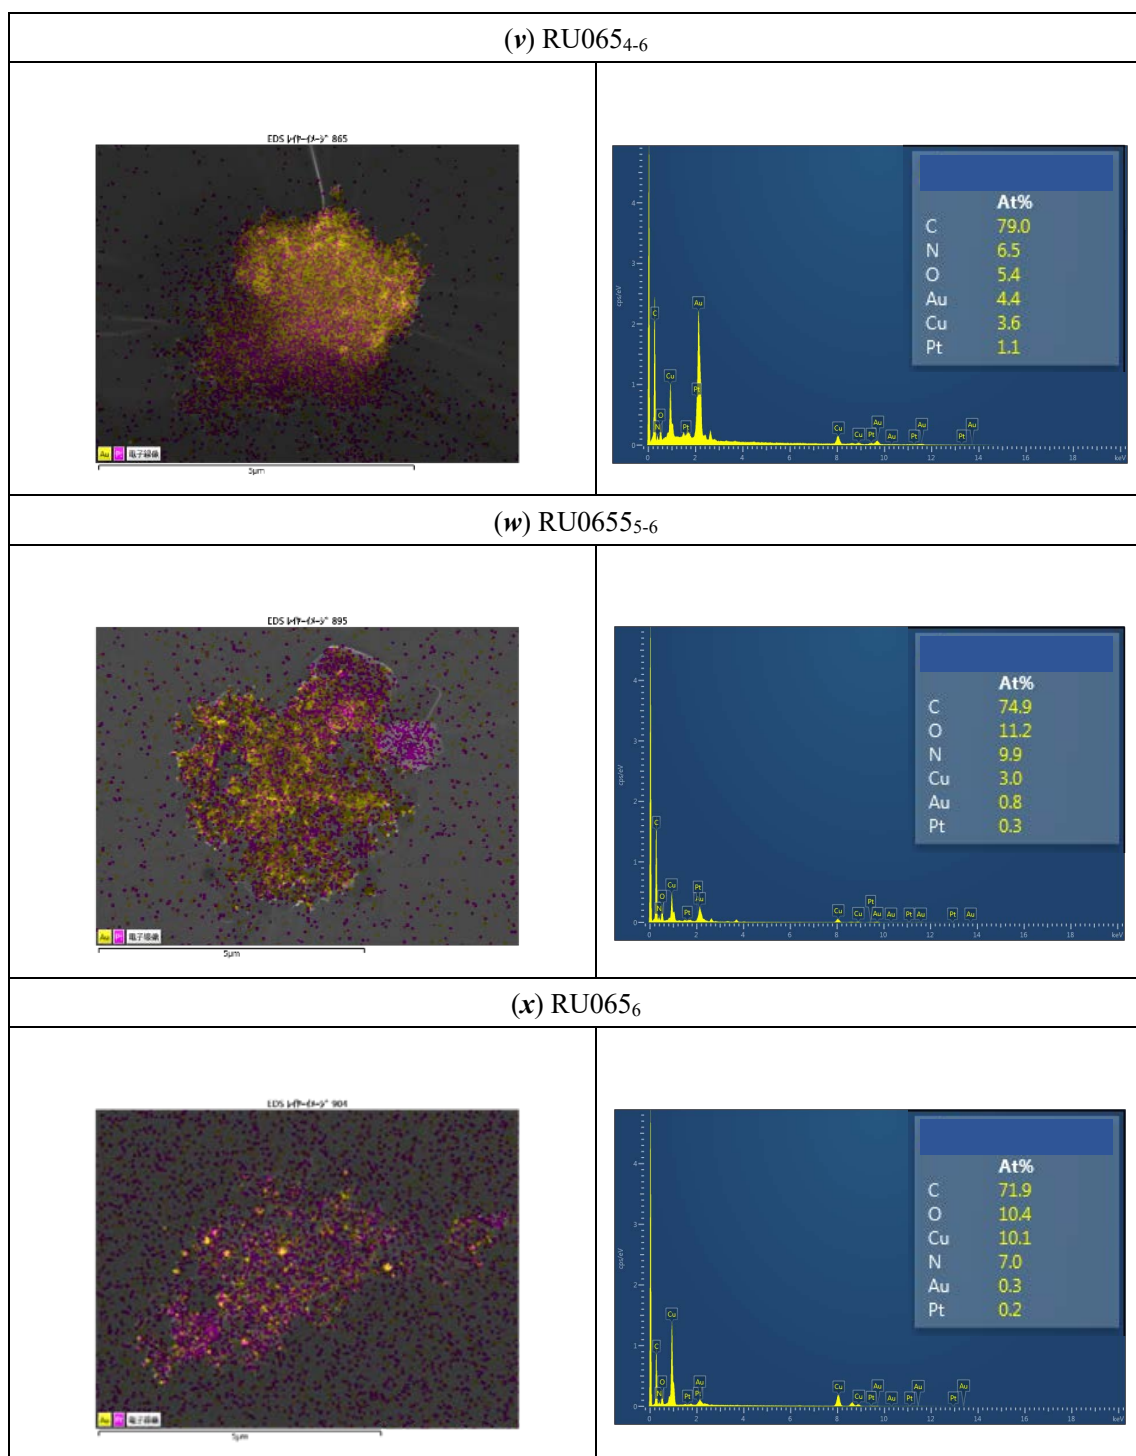

**Figure S4 (continued).** EDS-FESEM analysis of the precipitates from the reaction mixtures of  $\text{HAuCl}_4$ ,  $\text{H}_2\text{PtCl}_6$ , and RU065 (or its fragment peptide). Au and Pt distributions are colored in yellow and purple, respectively.  $[\text{Peptide}] = 2.0 \times 10^{-4} \text{ M}$  and  $[\text{HAuCl}_4] = [\text{H}_2\text{PtCl}_6] = 5.0 \times 10^{-5} \text{ M}$  in water at  $40^\circ \text{C}$  for 1 day.

**Table S2.** Summary of HPLC retention time and relative hydrophobic index (*H*) data for RU065 and its fragment peptides.

|     | Peptide                           | Retention time / min | Relative hydrophobic index ( <i>H</i> ) |
|-----|-----------------------------------|----------------------|-----------------------------------------|
| (a) | RU065                             | 15.15                | +1.48                                   |
| (b) | RU065 <sub>2-9</sub>              | 15.06                | +1.24                                   |
| (c) | RU065 <sub>3-9</sub>              | 13.60                | -2.39                                   |
| (d) | RU065 <sub>4-9</sub>              | 13.57                | -2.44                                   |
| (e) | RU065 <sub>5-9</sub>              | 14.99                | +1.06                                   |
| (f) | RU065 <sub>6-9</sub>              | 15.37                | +2.01                                   |
| (g) | RU065 <sub>1-8</sub>              | 15.20                | +1.59                                   |
| (h) | RU065 <sub>2-8</sub>              | 15.18                | +1.55                                   |
| (i) | RU065 <sub>3-8</sub>              | 13.80                | -1.87                                   |
| (j) | RU065 <sub>4-8</sub>              | 13.80                | -1.89                                   |
| (k) | RU065 <sub>5-8</sub>              | 15.24                | +1.69                                   |
| (l) | RU065 <sub>6-8</sub>              | 15.57                | +2.50                                   |
| (m) | RU065 <sub>1-7</sub>              | 15.50                | +2.34                                   |
| (n) | RU065 <sub>2-7</sub>              | 14.16                | -0.98                                   |
| (o) | RU065 <sub>3-7</sub>              | 12.57                | -4.93                                   |
| (p) | RU065 <sub>4-7</sub> <sup>a</sup> | 12.54                | -5.00                                   |
| (q) | RU065 <sub>5-7</sub>              | 13.84                | -1.78                                   |
| (r) | RU065 <sub>6-7</sub>              | 14.10                | -1.14                                   |
| (s) | RU065 <sub>1-6</sub>              | 15.53                | +2.42                                   |
| (t) | RU065 <sub>2-6</sub>              | 15.53                | +2.41                                   |
| (u) | RU065 <sub>3-6</sub>              | 13.91                | -1.60                                   |
| (v) | RU065 <sub>4-6</sub>              | 13.86                | -1.72                                   |
| (w) | RU065 <sub>5-6</sub>              | 15.57                | +2.52                                   |
| (x) | RU065 <sub>6</sub> <sup>b</sup>   | 16.57                | +5.00                                   |

<sup>a</sup>The most hydrophilic peptide had the most negative *H* value of -5.00.

<sup>b</sup>The most hydrophobic peptide had the most positive *H* value of +5.00.
